# Supplementary material for: BacPE: a versatile prime-editing platform in bacteria by inhibiting DNA exonucleases
Source: PubMed Central journal article supplement (PMC10821919; doi:10.1038/s41467-024-45114-4), 2024-01-27
Supplement: 41467_2024_45114_MOESM1_ESM.pdf [file 41467_2024_45114_MOESM1_ESM.pdf]

## Table of contents

### Supplementary Figures

Supplementary Figure 1. Schematic of the St1PE2 system for prime editing in *M. smegmatis* and *E. coli*.

Supplementary Figure 2. The effect of RT template length and PBS length on prime editing efficiency of St1PE2.

Supplementary Figure 3. Schematic of the SpPE system for prime editing in *E. coli*.

Supplementary Figure 4. PE3 nicks the non-target strand to increase prime editing efficiency.

Supplementary Figure 5. Mechanism of DNA mismatch repair in *E. coli*.

Supplementary Figure 6. The effect of MMR on prime editing efficiency in *E. coli*.

Supplementary Figure 7. The D516Y mutation introduced by St1PE2 system is confirmed by Sanger sequencing.

Supplementary Figure 8. Identification of key genetic determinants that affect insertion or deletion editing efficiency.

Supplementary Figure 9. Evaluation of the roles of 3' → 5' DNA exonucleases in prime editing.

Supplementary Figure 10. CRISPRi-mediated repression of gene expression with different spacers.

### Supplementary Tables

Supplementary Table 1. Strains used in this study.

Supplementary Table 2. Plasmids used in this study.

Supplementary Table 3. Primers used in this study.

### Supplementary Notes

Supplementary Note 1. Overview of pegRNA cloning protocol.

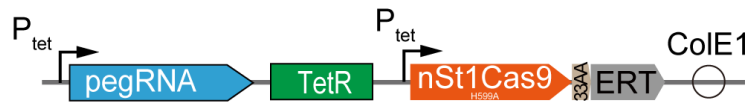

**Supplementary Figure 1. Schematic of the St1PE2 system for prime editing in *M. smegmatis* and *E. coli*.** The pegRNA and PE effector are under the control of the inducible P<sub>tet</sub> promoter.

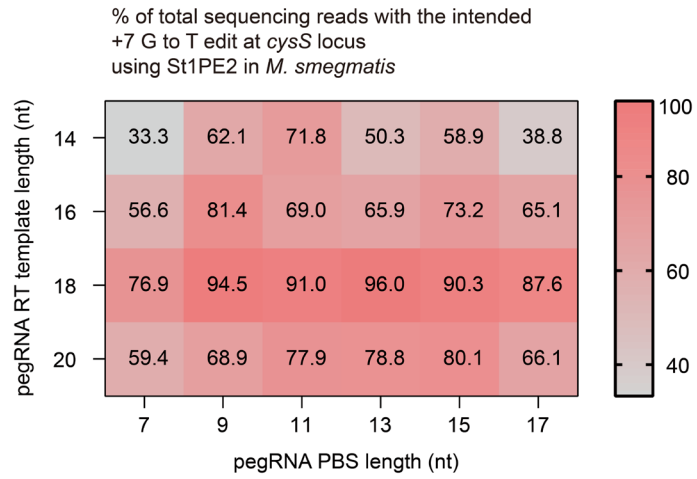

**Supplementary Figure 2. The effect of RT template length and PBS length on prime editing efficiency of St1PE2.** The heat maps show average editing efficiencies for given lengths of RT templates and PBS.

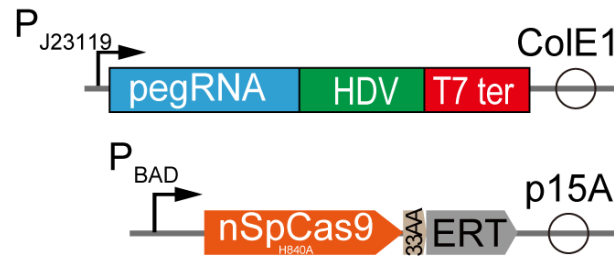

**Supplementary Figure 3. Schematic of the SpPE system for prime editing in *E. coli*.** The pegRNA and PE effector are encoded in two plasmids.

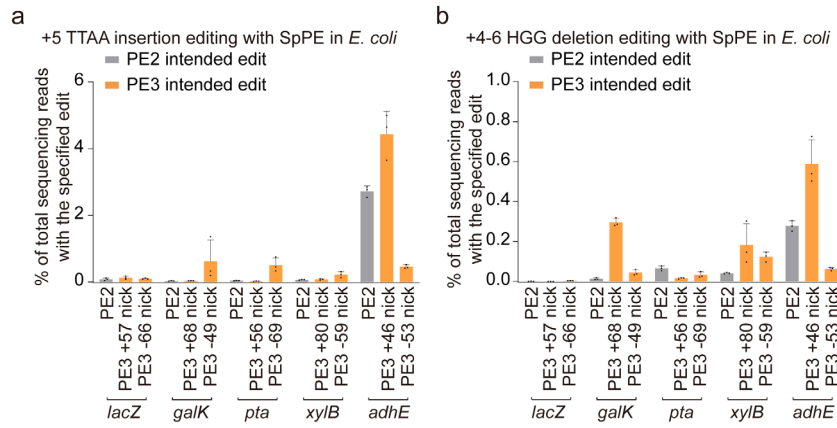

**Supplementary Figure 4. PE3 nicks the non-target strand to increase prime editing efficiency.** **a**, The effect of complementary strand nicking on insertion editing frequency. **b**, The effect of complementary strand nicking on deletion editing frequency.

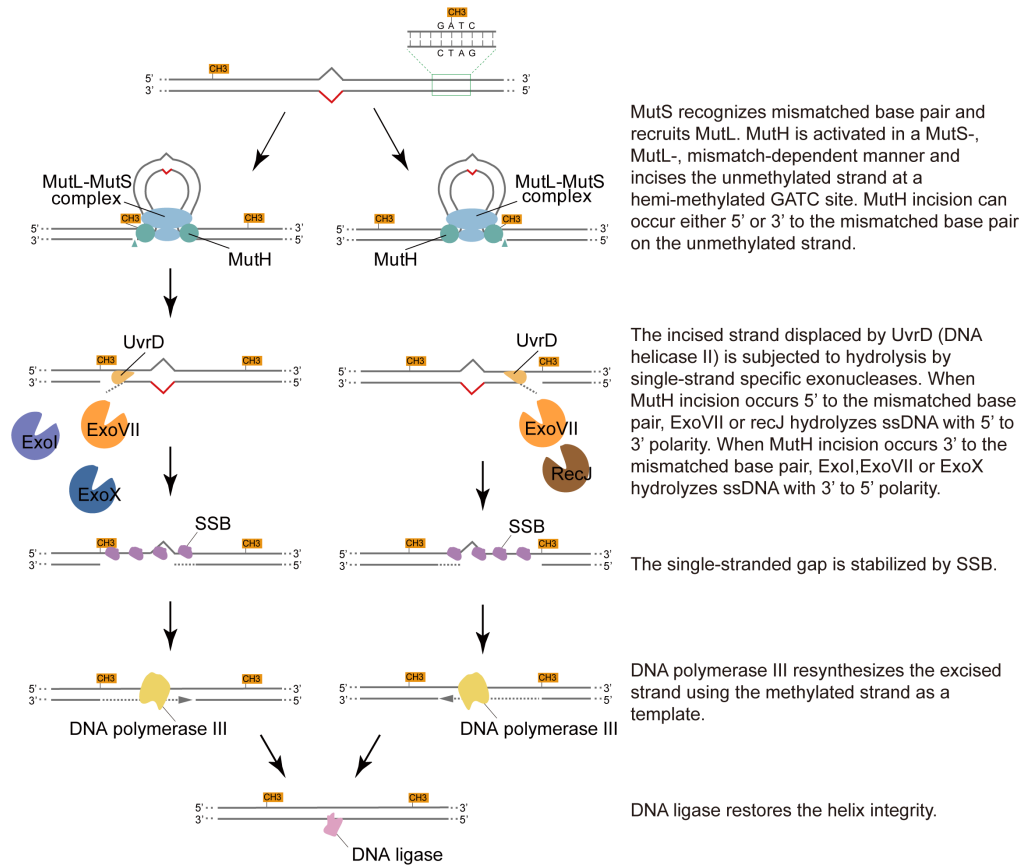

**Supplementary Figure 5. Mechanism of DNA mismatch repair in *E. coli*.** The newly synthesized strand is unmethylated.

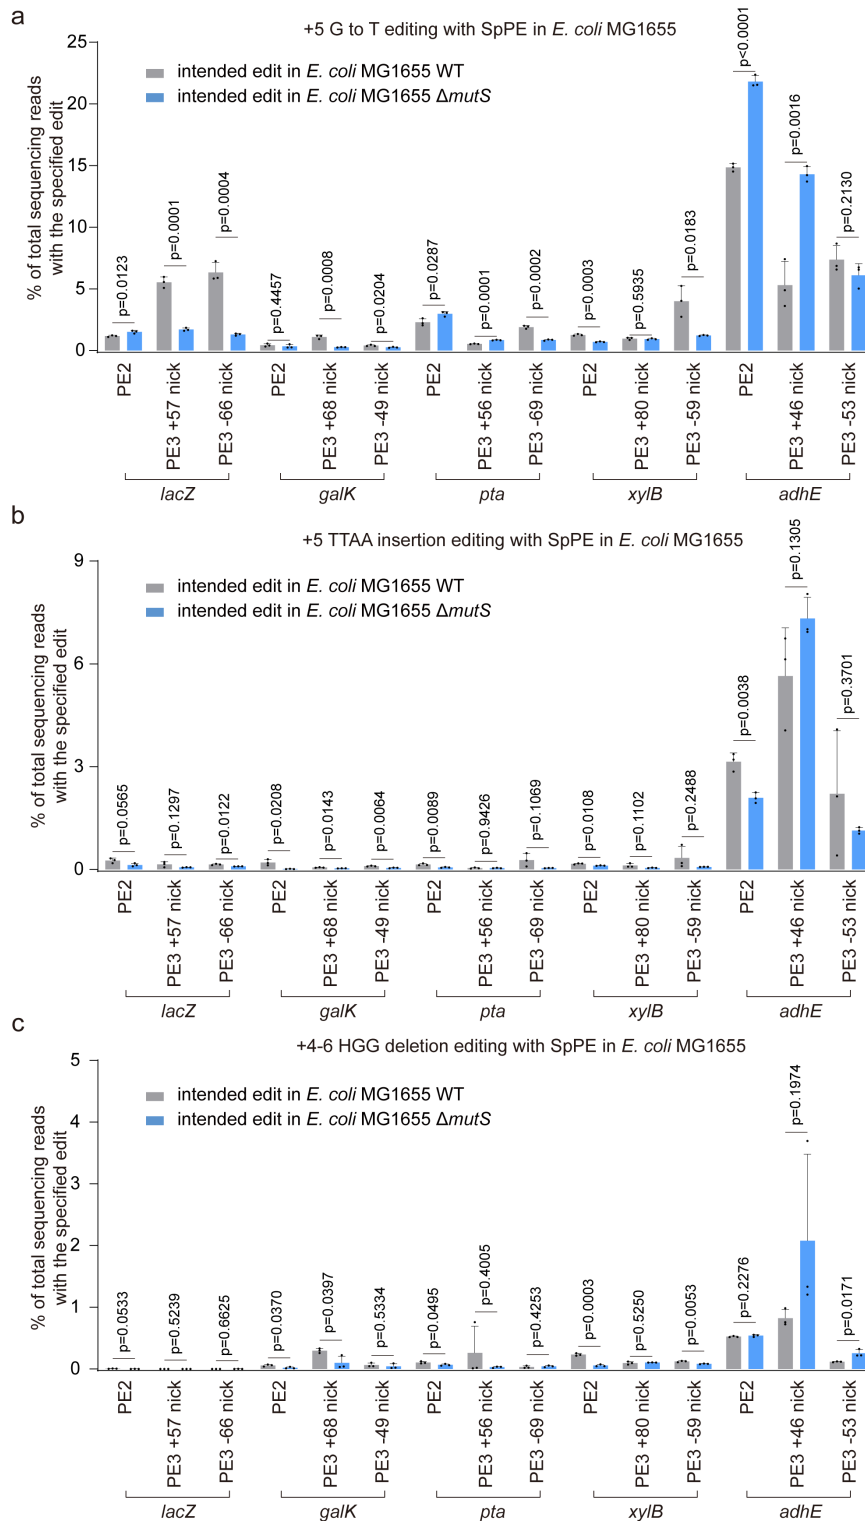

**Supplementary Figure 6. The effect of MMR on prime editing efficiency in *E. coli*.** **a**, +5 G to T editing efficiency in the WT strain and MMR-deficient strain. **b**, +5 TTAA insertion editing efficiency in the WT strain and MMR-deficient strain. **c**, +4-6 HGG deletion editing efficiency in the WT strain and MMR-deficient strain. H represents A, C or T. Data represent mean  $\pm$  s.d. of  $n = 3$  independent replicates.

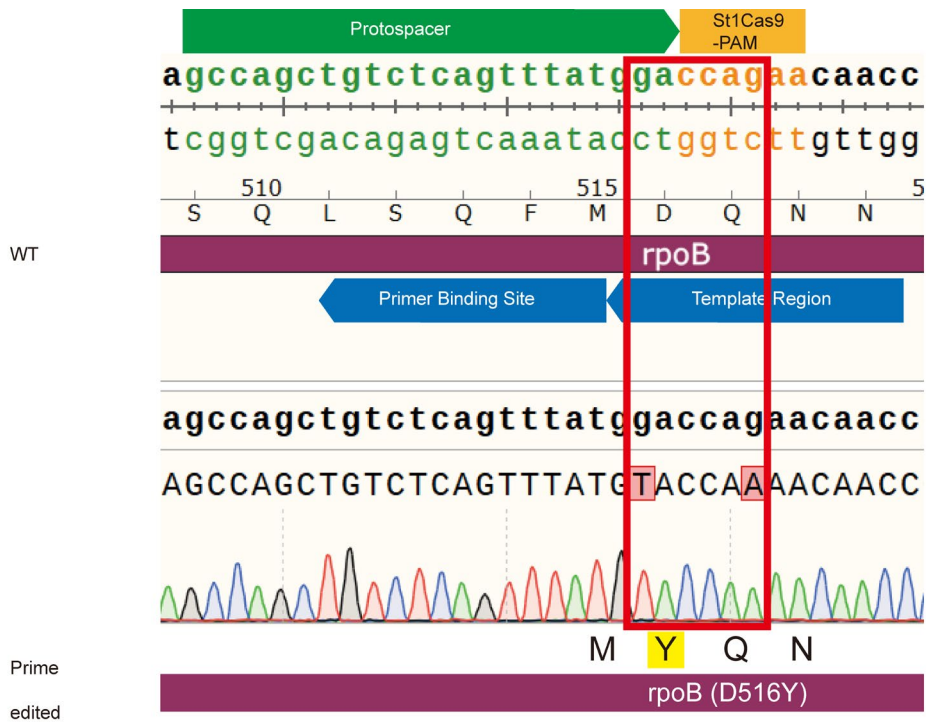

**Supplementary Figure 7. The D516Y mutation introduced by St1PE2 system is confirmed by Sanger sequencing.**



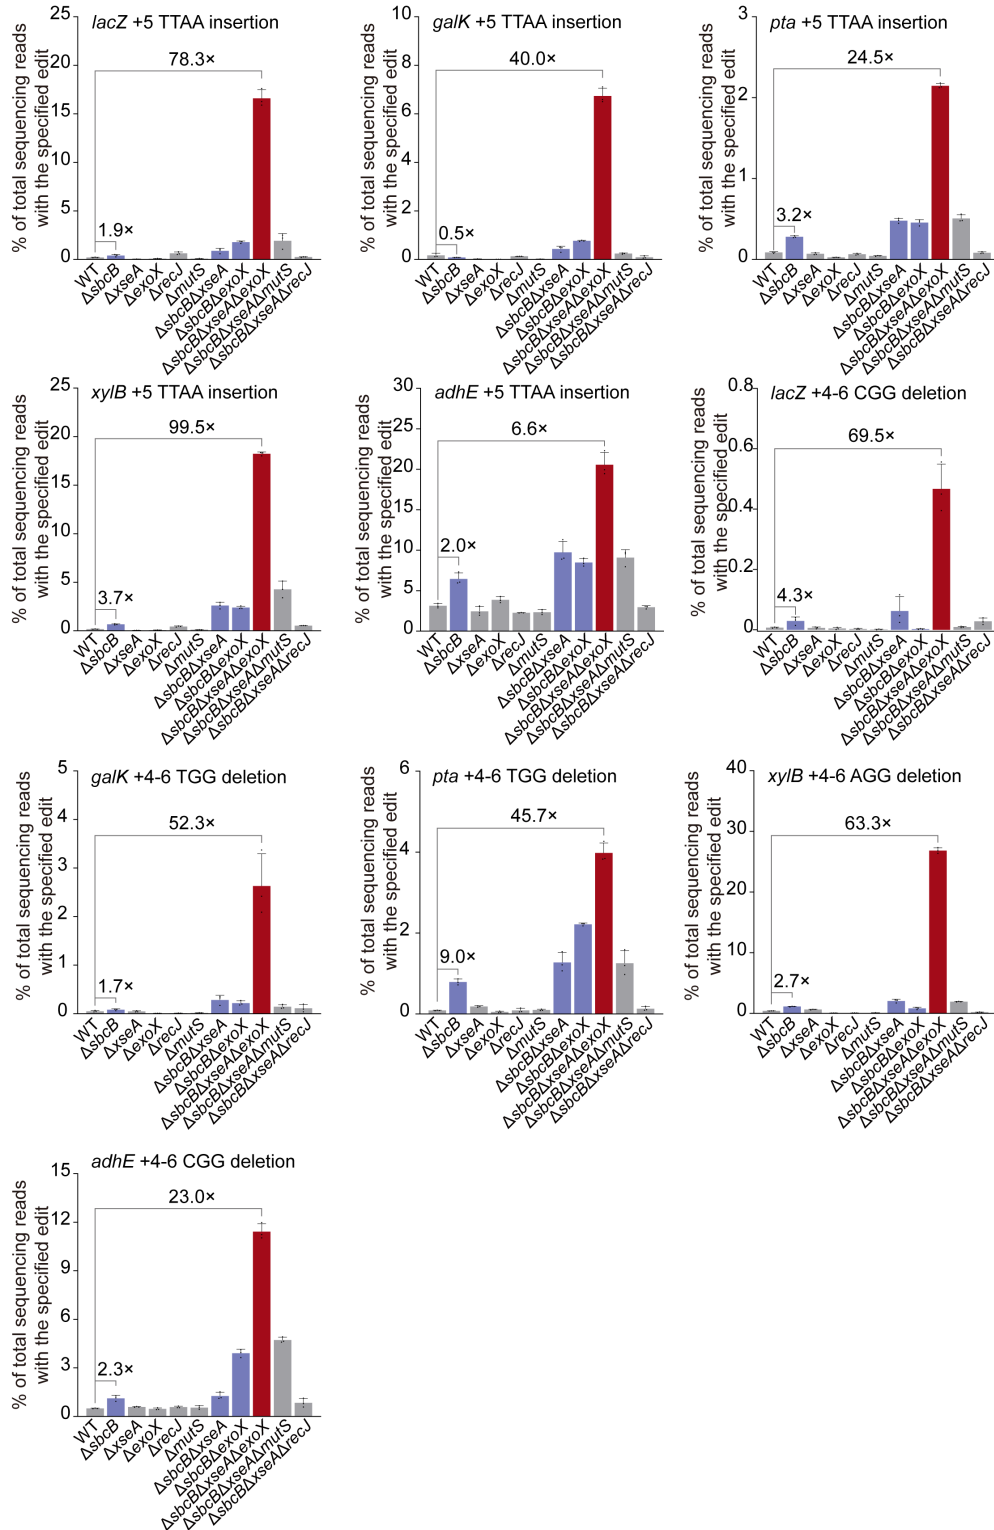

**Supplementary Figure 8. Identification of key genetic determinants that affect insertion or deletion editing efficiency.** Comparison of the +5 TTAA insertion or +4-6 HGG deletion efficiency in different *E. coli* mutant strains. H represents A, C or T.  $\Delta sbcB$ ,  $\Delta sbcB\Delta xseA$ , and  $\Delta sbcB\Delta exoX$  mutants are colored blue, and  $\Delta sbcB\Delta xseA\Delta exoX$  mutants are colored red.

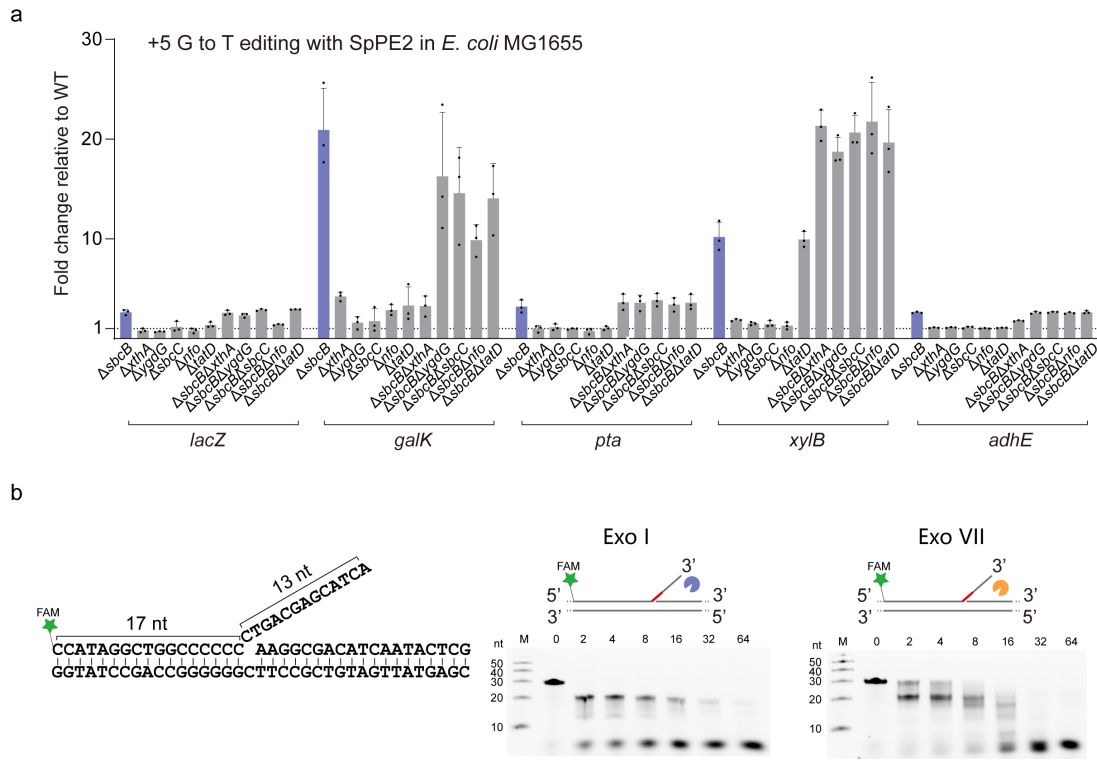

**Supplementary Figure 9. Evaluation of the roles of 3' → 5' DNA exonucleases in prime editing.** **a**, The impact of 3' → 5' DNA exonucleases on prime editing efficiency. The dashed line represents a relative editing efficiency in the wild-type strain. **b**, Biochemical evidence for 3'-directed hydrolysis of PE intermediates. In vitro DNA cleavage results for FAM-labeled PE intermediates by exonucleases. PE intermediates were mimicked by the annealed oligonucleotides. The cleaved products were analyzed by TBE-Urea-PAGE.

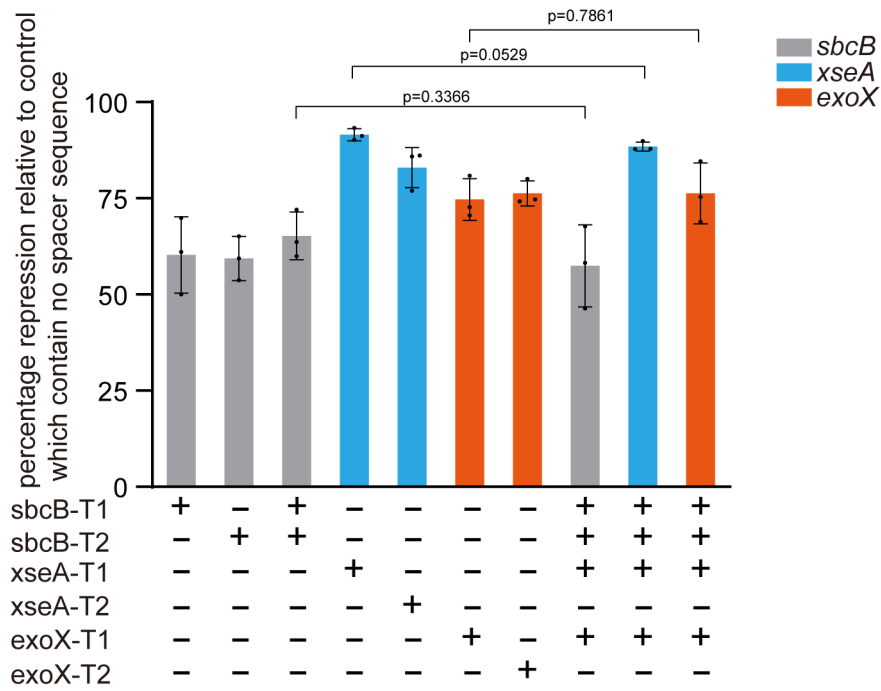

**Supplementary Figure 10. CRISPRi-mediated repression of gene expression with different spacers.** Gene-specific spacers were designed to target *sbcB*, *xseA* or *exoX*. In the BacPE system, different crRNAs were assembled into a single plasmid to inhibit *sbcB*, *xseA* and *exoX* simultaneously. Student's *t*-test was performed. Data represent mean  $\pm$  s.d. of  $n = 3$  independent replicates.

**Supplementary Table 1. Strains used in this study<sup>1</sup>.**

| Organism       | Strain  | Description                                                                                                                                                                                                                        | Reference                 |
|----------------|---------|------------------------------------------------------------------------------------------------------------------------------------------------------------------------------------------------------------------------------------|---------------------------|
| <i>E. coli</i> | Top10   | F- <i>mcrA</i> Δ( <i>mrr-hsdRMS-mcrBC</i> )φ80 <i>lacZ</i> Δ <i>M15</i> Δ <i>lacX74</i><br><i>recA1</i> <i>ara</i> Δ139Δ( <i>ara-leu</i> )7697 <i>galUgalK</i> <i>rpsL</i> (Str <sup>R</sup> ) <i>e</i><br><i>ndA1</i> <i>nupG</i> | Lab stock                 |
| <i>E. coli</i> | BW25113 | Δ <i>nhaR</i>                                                                                                                                                                                                                      | Baba <i>et al.</i> , 2006 |
| <i>E. coli</i> | BW25113 | Δ <i>hns</i>                                                                                                                                                                                                                       | Baba <i>et al.</i> , 2006 |
| <i>E. coli</i> | BW25113 | Δ <i>stpA</i>                                                                                                                                                                                                                      | Baba <i>et al.</i> , 2006 |
| <i>E. coli</i> | BW25113 | Δ <i>hupB</i>                                                                                                                                                                                                                      | Baba <i>et al.</i> , 2006 |
| <i>E. coli</i> | BW25113 | Δ <i>uvrY</i>                                                                                                                                                                                                                      | Baba <i>et al.</i> , 2006 |
| <i>E. coli</i> | BW25113 | Δ <i>rnt</i>                                                                                                                                                                                                                       | Baba <i>et al.</i> , 2006 |
| <i>E. coli</i> | BW25113 | Δ <i>aer</i>                                                                                                                                                                                                                       | Baba <i>et al.</i> , 2006 |
| <i>E. coli</i> | BW25113 | Δ <i>helD</i>                                                                                                                                                                                                                      | Baba <i>et al.</i> , 2006 |
| <i>E. coli</i> | BW25113 | Δ <i>yfcT</i>                                                                                                                                                                                                                      | Baba <i>et al.</i> , 2006 |
| <i>E. coli</i> | BW25113 | Δ <i>mltB</i>                                                                                                                                                                                                                      | Baba <i>et al.</i> , 2006 |
| <i>E. coli</i> | BW25113 | Δ <i>mltA</i>                                                                                                                                                                                                                      | Baba <i>et al.</i> , 2006 |
| <i>E. coli</i> | BW25113 | Δ <i>yoaA</i>                                                                                                                                                                                                                      | Baba <i>et al.</i> , 2006 |
| <i>E. coli</i> | BW25113 | Δ <i>radA</i>                                                                                                                                                                                                                      | Baba <i>et al.</i> , 2006 |
| <i>E. coli</i> | BW25113 | Δ <i>recA</i>                                                                                                                                                                                                                      | Baba <i>et al.</i> , 2006 |
| <i>E. coli</i> | BW25113 | Δ <i>yfcP</i>                                                                                                                                                                                                                      | Baba <i>et al.</i> , 2006 |
| <i>E. coli</i> | BW25113 | Δ <i>yebG</i>                                                                                                                                                                                                                      | Baba <i>et al.</i> , 2006 |
| <i>E. coli</i> | BW25113 | Δ <i>ydal</i>                                                                                                                                                                                                                      | Baba <i>et al.</i> , 2006 |
| <i>E. coli</i> | BW25113 | Δ <i>ynaK</i>                                                                                                                                                                                                                      | Baba <i>et al.</i> , 2006 |
| <i>E. coli</i> | BW25113 | Δ <i>ybhP</i>                                                                                                                                                                                                                      | Baba <i>et al.</i> , 2006 |
| <i>E. coli</i> | BW25113 | Δ <i>yajD</i>                                                                                                                                                                                                                      | Baba <i>et al.</i> , 2006 |
| <i>E. coli</i> | BW25113 | Δ <i>ybcO</i>                                                                                                                                                                                                                      | Baba <i>et al.</i> , 2006 |
| <i>E. coli</i> | BW25113 | Δ <i>yfcN</i>                                                                                                                                                                                                                      | Baba <i>et al.</i> , 2006 |
| <i>E. coli</i> | BW25113 | Δ <i>yeeS</i>                                                                                                                                                                                                                      | Baba <i>et al.</i> , 2006 |
| <i>E. coli</i> | BW25113 | Δ <i>yciV</i>                                                                                                                                                                                                                      | Baba <i>et al.</i> , 2006 |
| <i>E. coli</i> | BW25113 | Δ <i>ybhM</i>                                                                                                                                                                                                                      | Baba <i>et al.</i> , 2006 |
| <i>E. coli</i> | BW25113 | Δ <i>ykfG</i>                                                                                                                                                                                                                      | Baba <i>et al.</i> , 2006 |
| <i>E. coli</i> | BW25113 | Δ <i>rara</i>                                                                                                                                                                                                                      | Baba <i>et al.</i> , 2006 |
| <i>E. coli</i> | BW25113 | Δ <i>ycfH</i>                                                                                                                                                                                                                      | Baba <i>et al.</i> , 2006 |
| <i>E. coli</i> | BW25113 | Δ <i>ydan</i>                                                                                                                                                                                                                      | Baba <i>et al.</i> , 2006 |
| <i>E. coli</i> | BW25113 | Δ <i>ybhN</i>                                                                                                                                                                                                                      | Baba <i>et al.</i> , 2006 |
| <i>E. coli</i> | BW25113 | Δ <i>ybhO</i>                                                                                                                                                                                                                      | Baba <i>et al.</i> , 2006 |
| <i>E. coli</i> | BW25113 | Δ <i>ybhS</i>                                                                                                                                                                                                                      | Baba <i>et al.</i> , 2006 |
| <i>E. coli</i> | BW25113 | Δ <i>ybhG</i>                                                                                                                                                                                                                      | Baba <i>et al.</i> , 2006 |
| <i>E. coli</i> | BW25113 | Δ <i>yajC</i>                                                                                                                                                                                                                      | Baba <i>et al.</i> , 2006 |
| <i>E. coli</i> | BW25113 | Δ <i>ybcD</i>                                                                                                                                                                                                                      | Baba <i>et al.</i> , 2006 |
| <i>E. coli</i> | BW25113 | Δ <i>ybaZ</i>                                                                                                                                                                                                                      | Baba <i>et al.</i> , 2006 |
| <i>E. coli</i> | BW25113 | Δ <i>uvrD</i>                                                                                                                                                                                                                      | Baba <i>et al.</i> , 2006 |

| Organism       | Strain  | Description   | Reference                 |
|----------------|---------|---------------|---------------------------|
| <i>E. coli</i> | BW25113 | $\Delta djlA$ | Baba <i>et al.</i> , 2006 |
| <i>E. coli</i> | BW25113 | $\Delta dksA$ | Baba <i>et al.</i> , 2006 |
| <i>E. coli</i> | BW25113 | $\Delta ruvB$ | Baba <i>et al.</i> , 2006 |
| <i>E. coli</i> | BW25113 | $\Delta yfcO$ | Baba <i>et al.</i> , 2006 |
| <i>E. coli</i> | BW25113 | $\Delta ogt$  | Baba <i>et al.</i> , 2006 |
| <i>E. coli</i> | BW25113 | $\Delta ygiF$ | Baba <i>et al.</i> , 2006 |
| <i>E. coli</i> | BW25113 | $\Delta yqiH$ | Baba <i>et al.</i> , 2006 |
| <i>E. coli</i> | BW25113 | $\Delta yqiI$ | Baba <i>et al.</i> , 2006 |
| <i>E. coli</i> | BW25113 | $\Delta ygiH$ | Baba <i>et al.</i> , 2006 |
| <i>E. coli</i> | BW25113 | $\Delta yhbQ$ | Baba <i>et al.</i> , 2006 |
| <i>E. coli</i> | BW25113 | $\Delta rmuC$ | Baba <i>et al.</i> , 2006 |
| <i>E. coli</i> | BW25113 | $\Delta polA$ | Baba <i>et al.</i> , 2006 |
| <i>E. coli</i> | BW25113 | $\Delta alkA$ | Baba <i>et al.</i> , 2006 |
| <i>E. coli</i> | BW25113 | $\Delta recT$ | Baba <i>et al.</i> , 2006 |
| <i>E. coli</i> | BW25113 | $\Delta sbcC$ | Baba <i>et al.</i> , 2006 |
| <i>E. coli</i> | BW25113 | $\Delta mutL$ | Baba <i>et al.</i> , 2006 |
| <i>E. coli</i> | BW25113 | $\Delta recR$ | Baba <i>et al.</i> , 2006 |
| <i>E. coli</i> | BW25113 | $\Delta phr$  | Baba <i>et al.</i> , 2006 |
| <i>E. coli</i> | BW25113 | $\Delta ruvA$ | Baba <i>et al.</i> , 2006 |
| <i>E. coli</i> | BW25113 | $\Delta ruvC$ | Baba <i>et al.</i> , 2006 |
| <i>E. coli</i> | BW25113 | $\Delta tus$  | Baba <i>et al.</i> , 2006 |
| <i>E. coli</i> | BW25113 | $\Delta topB$ | Baba <i>et al.</i> , 2006 |
| <i>E. coli</i> | BW25113 | $\Delta holE$ | Baba <i>et al.</i> , 2006 |
| <i>E. coli</i> | BW25113 | $\Delta sbmC$ | Baba <i>et al.</i> , 2006 |
| <i>E. coli</i> | BW25113 | $\Delta alkB$ | Baba <i>et al.</i> , 2006 |
| <i>E. coli</i> | BW25113 | $\Delta slt$  | Baba <i>et al.</i> , 2006 |
| <i>E. coli</i> | BW25113 | $\Delta dnaK$ | Baba <i>et al.</i> , 2006 |
| <i>E. coli</i> | BW25113 | $\Delta dnaJ$ | Baba <i>et al.</i> , 2006 |
| <i>E. coli</i> | BW25113 | $\Delta yfcV$ | Baba <i>et al.</i> , 2006 |
| <i>E. coli</i> | BW25113 | $\Delta cbpA$ | Baba <i>et al.</i> , 2006 |
| <i>E. coli</i> | BW25113 | $\Delta xseB$ | Baba <i>et al.</i> , 2006 |
| <i>E. coli</i> | BW25113 | $\Delta rnhA$ | Baba <i>et al.</i> , 2006 |
| <i>E. coli</i> | BW25113 | $\Delta uvrB$ | Baba <i>et al.</i> , 2006 |
| <i>E. coli</i> | BW25113 | $\Delta rnhB$ | Baba <i>et al.</i> , 2006 |
| <i>E. coli</i> | BW25113 | $\Delta sbcD$ | Baba <i>et al.</i> , 2006 |
| <i>E. coli</i> | BW25113 | $\Delta nei$  | Baba <i>et al.</i> , 2006 |
| <i>E. coli</i> | BW25113 | $\Delta xthA$ | Baba <i>et al.</i> , 2006 |
| <i>E. coli</i> | BW25113 | $\Delta nfo$  | Baba <i>et al.</i> , 2006 |
| <i>E. coli</i> | BW25113 | $\Delta recB$ | Baba <i>et al.</i> , 2006 |
| <i>E. coli</i> | BW25113 | $\Delta recE$ | Baba <i>et al.</i> , 2006 |
| <i>E. coli</i> | BW25113 | $\Delta dnaQ$ | Baba <i>et al.</i> , 2006 |
| <i>E. coli</i> | BW25113 | $\Delta recJ$ | Baba <i>et al.</i> , 2006 |
| <i>E. coli</i> | BW25113 | $\Delta dinB$ | Baba <i>et al.</i> , 2006 |

| Organism       | Strain  | Description   | Reference                 |
|----------------|---------|---------------|---------------------------|
| <i>E. coli</i> | BW25113 | $\Delta xseA$ | Baba <i>et al.</i> , 2006 |
| <i>E. coli</i> | BW25113 | $\Delta nth$  | Baba <i>et al.</i> , 2006 |
| <i>E. coli</i> | BW25113 | $\Delta vsr$  | Baba <i>et al.</i> , 2006 |
| <i>E. coli</i> | BW25113 | $\Delta endA$ | Baba <i>et al.</i> , 2006 |
| <i>E. coli</i> | BW25113 | $\Delta ybhL$ | Baba <i>et al.</i> , 2006 |
| <i>E. coli</i> | BW25113 | $\Delta tgt$  | Baba <i>et al.</i> , 2006 |
| <i>E. coli</i> | BW25113 | $\Delta sbcB$ | Baba <i>et al.</i> , 2006 |
| <i>E. coli</i> | BW25113 | $\Delta exoX$ | Baba <i>et al.</i> , 2006 |
| <i>E. coli</i> | BW25113 | $\Delta uvrC$ | Baba <i>et al.</i> , 2006 |
| <i>E. coli</i> | BW25113 | $\Delta ybcC$ | Baba <i>et al.</i> , 2006 |
| <i>E. coli</i> | BW25113 | $\Delta rusA$ | Baba <i>et al.</i> , 2006 |
| <i>E. coli</i> | BW25113 | $\Delta cspD$ | Baba <i>et al.</i> , 2006 |
| <i>E. coli</i> | BW25113 | $\Delta dinD$ | Baba <i>et al.</i> , 2006 |
| <i>E. coli</i> | BW25113 | $\Delta recG$ | Baba <i>et al.</i> , 2006 |
| <i>E. coli</i> | BW25113 | $\Delta mltD$ | Baba <i>et al.</i> , 2006 |
| <i>E. coli</i> | BW25113 | $\Delta ybhF$ | Baba <i>et al.</i> , 2006 |
| <i>E. coli</i> | BW25113 | $\Delta exo$  | Baba <i>et al.</i> , 2006 |
| <i>E. coli</i> | BW25113 | $\Delta ygiG$ | Baba <i>et al.</i> , 2006 |
| <i>E. coli</i> | BW25113 | $\Delta nfi$  | Baba <i>et al.</i> , 2006 |
| <i>E. coli</i> | BW25113 | $\Delta hda$  | Baba <i>et al.</i> , 2006 |
| <i>E. coli</i> | BW25113 | $\Delta yicR$ | Baba <i>et al.</i> , 2006 |
| <i>E. coli</i> | BW25113 | $\Delta yafD$ | Baba <i>et al.</i> , 2006 |
| <i>E. coli</i> | BW25113 | $\Delta tatD$ | Baba <i>et al.</i> , 2006 |
| <i>E. coli</i> | BW25113 | $\Delta ydcM$ | Baba <i>et al.</i> , 2006 |
| <i>E. coli</i> | BW25113 | $\Delta ydaM$ | Baba <i>et al.</i> , 2006 |
| <i>E. coli</i> | BW25113 | $\Delta mutH$ | Baba <i>et al.</i> , 2006 |
| <i>E. coli</i> | BW25113 | $\Delta ung$  | Baba <i>et al.</i> , 2006 |
| <i>E. coli</i> | BW25113 | $\Delta mltC$ | Baba <i>et al.</i> , 2006 |
| <i>E. coli</i> | BW25113 | $\Delta ybhR$ | Baba <i>et al.</i> , 2006 |
| <i>E. coli</i> | BW25113 | $\Delta ydjQ$ | Baba <i>et al.</i> , 2006 |
| <i>E. coli</i> | BW25113 | $\Delta recO$ | Baba <i>et al.</i> , 2006 |
| <i>E. coli</i> | BW25113 | $\Delta recN$ | Baba <i>et al.</i> , 2006 |
| <i>E. coli</i> | BW25113 | $\Delta tag$  | Baba <i>et al.</i> , 2006 |
| <i>E. coli</i> | BW25113 | $\Delta mutS$ | Baba <i>et al.</i> , 2006 |
| <i>E. coli</i> | BW25113 | $\Delta pbl$  | Baba <i>et al.</i> , 2006 |
| <i>E. coli</i> | BW25113 | $\Delta dam$  | Baba <i>et al.</i> , 2006 |
| <i>E. coli</i> | BW25113 | $\Delta mutM$ | Baba <i>et al.</i> , 2006 |
| <i>E. coli</i> | BW25113 | $\Delta ybhQ$ | Baba <i>et al.</i> , 2006 |
| <i>E. coli</i> | BW25113 | $\Delta recF$ | Baba <i>et al.</i> , 2006 |
| <i>E. coli</i> | BW25113 | $\Delta yfcS$ | Baba <i>et al.</i> , 2006 |
| <i>E. coli</i> | BW25113 | $\Delta yfcU$ | Baba <i>et al.</i> , 2006 |
| <i>E. coli</i> | BW25113 | $\Delta yfcQ$ | Baba <i>et al.</i> , 2006 |
| <i>E. coli</i> | BW25113 | $\Delta dinG$ | Baba <i>et al.</i> , 2006 |

| Organism             | Strain              | Description                         | Reference                 |
|----------------------|---------------------|-------------------------------------|---------------------------|
| <i>E. coli</i>       | BW25113             | $\Delta recC$                       | Baba <i>et al.</i> , 2006 |
| <i>E. coli</i>       | BW25113             | $\Delta recD$                       | Baba <i>et al.</i> , 2006 |
| <i>E. coli</i>       | BW25113             | $\Delta polB$                       | Baba <i>et al.</i> , 2006 |
| <i>E. coli</i>       | BW25113             | $\Delta emtA$                       | Baba <i>et al.</i> , 2006 |
| <i>E. coli</i>       | BW25113             | $\Delta yeeY$                       | Baba <i>et al.</i> , 2006 |
| <i>E. coli</i>       | BW25113             | $\Delta recQ$                       | Baba <i>et al.</i> , 2006 |
| <i>E. coli</i>       | BW25113             |                                     | Lab stock                 |
| <i>M. smegmatis</i>  | mc <sup>2</sup> 155 |                                     | Lab stock                 |
| <i>E. coli</i>       | MG1655              |                                     | Lab stock                 |
| <i>E. coli</i>       | MG1655              | $\Delta sbcB$                       | This study                |
| <i>E. coli</i>       | MG1655              | $\Delta xseA$                       | This study                |
| <i>E. coli</i>       | MG1655              | $\Delta mutS$                       | This study                |
| <i>E. coli</i>       | MG1655              | $\Delta recJ$                       | This study                |
| <i>E. coli</i>       | MG1655              | $\Delta exoX$                       | This study                |
| <i>E. coli</i>       | MG1655              | $\Delta sbcB\Delta xseA$            | This study                |
| <i>E. coli</i>       | MG1655              | $\Delta sbcB\Delta exoX$            | This study                |
| <i>E. coli</i>       | MG1655              | $\Delta sbcB\Delta xseA\Delta exoX$ | This study                |
| <i>E. coli</i>       | MG1655              | $\Delta sbcB\Delta xseA\Delta mutS$ | This study                |
| <i>E. coli</i>       | MG1655              | $\Delta sbcB\Delta xseA\Delta recJ$ | This study                |
| <i>E. coli</i>       | MG1655              | $\Delta xthA$                       | This study                |
| <i>E. coli</i>       | MG1655              | $\Delta ygdG$                       | This study                |
| <i>E. coli</i>       | MG1655              | $\Delta sbcC$                       | This study                |
| <i>E. coli</i>       | MG1655              | $\Delta nfo$                        | This study                |
| <i>E. coli</i>       | MG1655              | $\Delta tatD$                       | This study                |
| <i>E. coli</i>       | MG1655              | $\Delta sbcB\Delta xthA$            | This study                |
| <i>E. coli</i>       | MG1655              | $\Delta sbcB\Delta ygdG$            | This study                |
| <i>E. coli</i>       | MG1655              | $\Delta sbcB\Delta sbcC$            | This study                |
| <i>E. coli</i>       | MG1655              | $\Delta sbcB\Delta nfo$             | This study                |
| <i>E. coli</i>       | MG1655              | $\Delta sbcB\Delta tatD$            | This study                |
| <i>K. pneumoniae</i> | 1.6366              |                                     | Lab stock                 |
| <i>K. pneumoniae</i> | 1.6366              | $\Delta sbcB\Delta xseA\Delta exoX$ | This study                |
| <i>A. baumannii</i>  | ATCC17978           |                                     | Lab stock                 |
| <i>A. baumannii</i>  | ATCC17978           | $\Delta xseA\Delta exoX$            | This study                |

**Supplementary Table 2. Plasmids used in this study<sup>2, 3, 4, 5</sup>.**

| Plasmid ID           | Description                                                                 | Reference                   | Access link                                                                                                                                                           |
|----------------------|-----------------------------------------------------------------------------|-----------------------------|-----------------------------------------------------------------------------------------------------------------------------------------------------------------------|
| MS_PE                | Genome editing in <i>M. smegmatis</i>                                       | This study                  | <a href="https://benchling.com/s/seq-01AjOPTgqYsFA945VAd3?m=slm-82RyHHyq513P6TR28WDL">https://benchling.com/s/seq-01AjOPTgqYsFA945VAd3?m=slm-82RyHHyq513P6TR28WDL</a> |
| MS_PE_Cb             | Genome editing in Keio mutants                                              | This study                  | <a href="https://benchling.com/s/seq-x6t1tboKzgzWCQqlen0?m=slm-IYtVOtvw6CnslizZbtJs">https://benchling.com/s/seq-x6t1tboKzgzWCQqlen0?m=slm-IYtVOtvw6CnslizZbtJs</a>   |
| Sp_PE                | Genome editing in <i>E. coli</i> , PE2 is under control of P <sub>BAD</sub> | This study                  | <a href="https://benchling.com/s/seq-tSYVS1PpE5B11Zk5sJn3?m=slm-YZDhDKBPpbIfqkrktE57">https://benchling.com/s/seq-tSYVS1PpE5B11Zk5sJn3?m=slm-YZDhDKBPpbIfqkrktE57</a> |
| pegRNA2              | P <sub>J23119</sub> -driven pegRNA expression                               | This study                  | <a href="https://benchling.com/s/seq-irwOdkHlaPmWbcuixwx6?m=slm-g2cY7ySHsFTOa3aNI4nc">https://benchling.com/s/seq-irwOdkHlaPmWbcuixwx6?m=slm-g2cY7ySHsFTOa3aNI4nc</a> |
| pegRNA2_tevopre Q1   | P <sub>J23119</sub> -driven epegRNA expression                              | This study                  | <a href="https://benchling.com/s/seq-rOthM2vP1E2xZ32jf20U?m=slm-7BQKIJsvWWCEHYODYXUh">https://benchling.com/s/seq-rOthM2vP1E2xZ32jf20U?m=slm-7BQKIJsvWWCEHYODYXUh</a> |
| pegRNA2_mpknot       | P <sub>J23119</sub> -driven epegRNA expression                              | This study                  | <a href="https://benchling.com/s/seq-6nSPQeuoUAOJR1e4mU1L?m=slm-STwfOytMyZsuS8cbX8Ri">https://benchling.com/s/seq-6nSPQeuoUAOJR1e4mU1L?m=slm-STwfOytMyZsuS8cbX8Ri</a> |
| KP_PE                | Genome editing in <i>K. pneumoniae</i>                                      | This study                  | <a href="https://benchling.com/s/seq-UUSFYrnvTfrWvFZeumPk?m=slm-KccXdhXRRGEVv7gr8BfV">https://benchling.com/s/seq-UUSFYrnvTfrWvFZeumPk?m=slm-KccXdhXRRGEVv7gr8BfV</a> |
| Ab_PE                | Genome editing in <i>A. baumannii</i>                                       | This study                  | <a href="https://benchling.com/s/seq-CDrVWPuUATPosQjI88m5?m=slm-hoDqFhhoXZbGtooxQ114">https://benchling.com/s/seq-CDrVWPuUATPosQjI88m5?m=slm-hoDqFhhoXZbGtooxQ114</a> |
| pBbS8c_ddCpf1_fi nal | Inhibition of 3'-directed hydrolysis pathway                                | This study                  | <a href="https://benchling.com/s/seq-IV0cRNa1ngRHHJC0Dlto?m=slm-I4inF2LHwLFwRXe0ZqcN">https://benchling.com/s/seq-IV0cRNa1ngRHHJC0Dlto?m=slm-I4inF2LHwLFwRXe0ZqcN</a> |
| pKD46-Cas9-RecA-Cure | <i>E. coli</i> genome editing vector                                        | Bikard <i>et al.</i> , 2013 |                                                                                                                                                                       |
| pCRISPR              | <i>E. coli</i> genome editing vector                                        | Bikard <i>et al.</i> , 2013 |                                                                                                                                                                       |
| pBbS8c_ddCpf1        | <i>E. coli</i> CRISPRi vector                                               | Jervis <i>et al.</i> , 2021 |                                                                                                                                                                       |
| pBECAb               | <i>A. baumannii</i> genome editing vector                                   | Wang <i>et al.</i> , 2019   |                                                                                                                                                                       |
| pCasKP               | <i>K. pneumoniae</i> genome editing vector                                  | Wang <i>et al.</i> , 2018   |                                                                                                                                                                       |
| pSGKP                | <i>K. pneumoniae</i> genome editing vector                                  | Wang <i>et al.</i> , 2018   |                                                                                                                                                                       |



**Supplementary Table 3. Primers used in this study.**

| Name                              | Sequence (5'->3')                                                                             | Purpose         |
|-----------------------------------|-----------------------------------------------------------------------------------------------|-----------------|
| pegRNA spacer_F                   | TAGTNNNNNNNNNNNNNNNNNNNNNGTTTT                                                                | pegRNA assembly |
| pegRNA spacer_R                   | GAGATTTTGNNNNNNNNNNNNNNNNNNN                                                                  | pegRNA assembly |
| pegRNA 3' Suspension_F            | GGTGCNNNNNNNNNNNNNNNNNNNNNNNN                                                                 | pegRNA assembly |
| pegRNA 3' Suspension_R            | GCGCNNNNNNNNNNNNNNNNNNNNNNNN                                                                  | pegRNA assembly |
| pegRNA scaffold_F                 | AGAGCTAGAAATAGCAAGTTAAAATAAGGCTAGTCCGT<br>TATCAACTTGAAAAAGTGGCACCGAGTC                        | pegRNA assembly |
| pegRNA scaffold_R                 | CGTGGCTGAGCCACGGTAAAAAGTTCAACTATTGCCT<br>GATCGGAATAAAATTGAACGATAAAGAT                         | pegRNA assembly |
| MSMEG_3634_UP-F                   | GGAgcggcacattcgagcaccgcGTCTTTGACTCTGGTACCAGA<br>AGCTACAAAGATAAGGCTTCATGCCGAAATCAAC            | Fig. 1a         |
| MSMEG_0200_UP-F                   | GGAgttgccagtcgagcagacGTCTTTGACTCTGGTACCAGA<br>AGCTACAAAGATAAGGCTTCATGCCGAAATCAAC              | Fig. 1a         |
| MSMEG_3488_UP-F                   | GGAgcatcggactcgatcagcgtGTCTTTGACTCTGGTACCAGA<br>AGCTACAAAGATAAGGCTTCATGCCGAAATCAAC            | Fig. 1a         |
| MSMEG_3634_UP-R                   | ATGACAGGGTGTGATTTCGGCATGAAGCCTTATCTTTG<br>TAGCTTCTGGTACCAGAGTACAAAGACcggtcgtcgaatgtgc<br>cgc  | Fig. 1a         |
| MSMEG_0200_UP-R                   | ATGACAGGGTGTGATTTCGGCATGAAGCCTTATCTTTG<br>TAGCTTCTGGTACCAGAGTACAAAGACgtctcctcggactgggc<br>aac | Fig. 1a         |
| MSMEG_3488_UP-R                   | ATGACAGGGTGTGATTTCGGCATGAAGCCTTATCTTTG<br>TAGCTTCTGGTACCAGAGTACAAAGACacgtgatcagtcgca<br>tgc   | Fig. 1a         |
| +7G-to-<br>TMSMEG_3634_DN-F       | ACCCTGTCATTTTATGGCAGGGTGTccacagttAtcccggtcgtc<br>gaatgtg                                      | Fig. 1a         |
| +6CTTinsMSMEG_3634_<br>DN-F       | ACCCTGTCATTTTATGGCAGGGTGTccacagtcttAAGcccggt<br>cgtcgaatgtg                                   | Fig. 1a         |
| +6-<br>8AGAdelMSMEG_3634_<br>DN-F | ACCCTGTCATTTTATGGCAGGGTGTccacagtcggtcgtcga<br>tgtg                                            | Fig. 1a         |
| +7G-to-<br>TMSMEG_0200_DN-F       | ACCCTGTCATTTTATGGCAGGGTGTccacacttAtcggctcgtcgg<br>actggg                                      | Fig. 1a         |
| +6CTTinsMSMEG_0200_<br>DN-F       | ACCCTGTCATTTTATGGCAGGGTGTccacacttctAAGcggctctg<br>ctcggactggg                                 | Fig. 1a         |
| +6-<br>8AGAdelMSMEG_0200_<br>DN-F | ACCCTGTCATTTTATGGCAGGGTGTccacactcggctcgtcggact<br>ggg                                         | Fig. 1a         |
| +7G-to-<br>TMSMEG_3488_DN-F       | ACCCTGTCATTTTATGGCAGGGTGTccacagttAtcgactgatcg<br>agtccg                                       | Fig. 1a         |
| +6CTTinsMSMEG_3488_<br>DN-F       | ACCCTGTCATTTTATGGCAGGGTGTccacagtcttAAGcagcgtg<br>atcagatccg                                   | Fig. 1a         |
| +6-<br>8AGAdelMSMEG_3488_<br>DN-F | ACCCTGTCATTTTATGGCAGGGTGTccagtcgacgtgatcaggt<br>ccg                                           | Fig. 1a         |
| +7G-to-<br>TMSMEG_3634_DN-R       | AAAacattcgagcaccgggaTaactgtggACACCCTGCCATAAA                                                  | Fig. 1a         |
| +6CTTinsMSMEG_3634_<br>DN-F       | AAAacattcgagcaccgggCTTagaactgtggACACCCTGCCATAA                                                | Fig. 1a         |

|                                   |                                                                                               |         |
|-----------------------------------|-----------------------------------------------------------------------------------------------|---------|
| DN-R                              | A                                                                                             |         |
| +6-<br>8AGAdelMSMEG_3634_<br>DN-R | AAAcacattcgagaccgcgactgtggACACCCTGCCATAAA                                                     | Fig. 1a |
| +7G-to-<br>TMSMEG_0200_DN-R       | AAAccagtcgagcagaccgaTaagtgtggACACCCTGCCATAAA                                                  | Fig. 1a |
| +6CTTinsMSMEG_0200_<br>DN-R       | AAAccagtcgagcagaccgCTTagaagtgtggACACCCTGCCATA<br>AA                                           | Fig. 1a |
| +6-<br>8AGAdelMSMEG_0200_<br>DN-R | AAAccagtcgagcagaccgagtgtggACACCCTGCCATAAA                                                     | Fig. 1a |
| +7G-to-<br>TMSMEG_3488_DN-R       | AAAcggactcgatcagcgtcgaTaactgtgACACCCTGCCATAAA                                                 | Fig. 1a |
| +6CTTinsMSMEG_3488_<br>DN-R       | AAAcggactcgatcagcgtcgaCTTagaactgtgACACCCTGCCATAAA                                             | Fig. 1a |
| +6-<br>8AGAdelMSMEG_3488_<br>DN-R | AAAcggactcgatcagcgtgactgtgACACCCTGCCATAAA                                                     | Fig. 1a |
| cysS_UP-F                         | GGAgatctggtgtcccacccaGTCTTTGTACTCTGGTACCAGAA<br>GCTACAAAGATAAAGGCTTCATGCCGAAATCAAC            | Sup.2   |
| cysS_UP-R                         | ATGACAGGGTGTGATTTCGGCATGAAGCCTTATCTTTG<br>TAGCTTCTGGTACCAGAGTACAAAGACTggtgcgggaacacca<br>gatc | Sup.2   |
| cysS+sapI_F                       | ACCCTGTCATTTTATGGCAGGGTGTggaagagcccgtcttcg                                                    | Sup.2   |
| cysS+sapI_R                       | aaacgaagagcgggctctccACACCCTGCCATAAA                                                           | Sup.2   |
| cysS_opti_1_F                     | TGTtctcgttAtcgtggtcgggga                                                                      | Sup.2   |
| cysS_opti_2_F                     | TGTtctcgttAtcgtggtcggggaac                                                                    | Sup.2   |
| cysS_opti_3_F                     | TGTtctcgttAtcgtggtcggggaacac                                                                  | Sup.2   |
| cysS_opti_4_F                     | TGTtctcgttAtcgtggtcggggaacacca                                                                | Sup.2   |
| cysS_opti_5_F                     | TGTtctcgttAtcgtggtcggggaacaccaga                                                              | Sup.2   |
| cysS_opti_6_F                     | TGTtctcgttAtcgtggtcggggaacaccagatc                                                            | Sup.2   |
| cysS_opti_7_F                     | TGTgatctcgttAtcgtggtcgggga                                                                    | Sup.2   |
| cysS_opti_8_F                     | TGTgatctcgttAtcgtggtcggggaac                                                                  | Sup.2   |
| cysS_opti_9_F                     | TGTgatctcgttAtcgtggtcggggaacac                                                                | Sup.2   |
| cysS_opti_10_F                    | TGTgatctcgttAtcgtggtcggggaacacca                                                              | Sup.2   |
| cysS_opti_11_F                    | TGTgatctcgttAtcgtggtcggggaacaccaga                                                            | Sup.2   |
| cysS_opti_12_F                    | TGTgatctcgttAtcgtggtcggggaacaccagatc                                                          | Sup.2   |
| cysS_opti_13_F                    | TGTgcatctcgttAtcgtggtcgggga                                                                   | Sup.2   |
| cysS_opti_14_F                    | TGTgcatctcgttAtcgtggtcggggaac                                                                 | Sup.2   |
| cysS_opti_15_F                    | TGTgcatctcgttAtcgtggtcggggaacac                                                               | Sup.2   |
| cysS_opti_16_F                    | TGTgcatctcgttAtcgtggtcggggaacacca                                                             | Sup.2   |
| cysS_opti_17_F                    | TGTgcatctcgttAtcgtggtcggggaacaccaga                                                           | Sup.2   |
| cysS_opti_18_F                    | TGTgcatctcgttAtcgtggtcggggaacaccagatc                                                         | Sup.2   |
| cysS_opti_19_F                    | TGTgcatctcgttAtcgtggtcgggga                                                                   | Sup.2   |
| cysS_opti_20_F                    | TGTgcatctcgttAtcgtggtcggggaac                                                                 | Sup.2   |
| cysS_opti_21_F                    | TGTgcatctcgttAtcgtggtcggggaacac                                                               | Sup.2   |
| cysS_opti_22_F                    | TGTgcatctcgttAtcgtggtcggggaacacca                                                             | Sup.2   |
| cysS_opti_23_F                    | TGTgcatctcgttAtcgtggtcggggaacaccaga                                                           | Sup.2   |
| cysS_opti_24_F                    | TGTgcatctcgttAtcgtggtcggggaacaccagatc                                                         | Sup.2   |

|                |                                                                                                |         |
|----------------|------------------------------------------------------------------------------------------------|---------|
| cysS_opti_1_R  | AAAAtcccgcaccacgaTaacgaga                                                                      | Sup.2   |
| cysS_opti_2_R  | AAAgttcccgcaccacgaTaacgaga                                                                     | Sup.2   |
| cysS_opti_3_R  | AAAgttcccgcaccacgaTaacgaga                                                                     | Sup.2   |
| cysS_opti_4_R  | AAAtgtgttcccgcaccacgaTaacgaga                                                                  | Sup.2   |
| cysS_opti_5_R  | AAAAtcgtgttcccgcaccacgaTaacgaga                                                                | Sup.2   |
| cysS_opti_6_R  | AAAgatctgtgttcccgcaccacgaTaacgaga                                                              | Sup.2   |
| cysS_opti_7_R  | AAAAtcccgcaccacgaTaacgagatc                                                                    | Sup.2   |
| cysS_opti_8_R  | AAAgttcccgcaccacgaTaacgagatc                                                                   | Sup.2   |
| cysS_opti_9_R  | AAAgttcccgcaccacgaTaacgagatc                                                                   | Sup.2   |
| cysS_opti_10_R | AAAgttcccgcaccacgaTaacgagatc                                                                   | Sup.2   |
| cysS_opti_11_R | AAAtcgtgttcccgcaccacgaTaacgagatc                                                               | Sup.2   |
| cysS_opti_12_R | AAAgatctgtgttcccgcaccacgaTaacgagatc                                                            | Sup.2   |
| cysS_opti_13_R | AAAAtcccgcaccacgaTaacgagatcgc                                                                  | Sup.2   |
| cysS_opti_14_R | AAAgttcccgcaccacgaTaacgagatcgc                                                                 | Sup.2   |
| cysS_opti_15_R | AAAgttcccgcaccacgaTaacgagatcgc                                                                 | Sup.2   |
| cysS_opti_16_R | AAAtgtgttcccgcaccacgaTaacgagatcgc                                                              | Sup.2   |
| cysS_opti_17_R | AAAtcgtgttcccgcaccacgaTaacgagatcgc                                                             | Sup.2   |
| cysS_opti_18_R | AAAgatctgtgttcccgcaccacgaTaacgagatcgc                                                          | Sup.2   |
| cysS_opti_19_R | AAAAtcccgcaccacgaTaacgagatcgcgc                                                                | Sup.2   |
| cysS_opti_20_R | AAAgttcccgcaccacgaTaacgagatcgcgc                                                               | Sup.2   |
| cysS_opti_21_R | AAAgttcccgcaccacgaTaacgagatcgcgc                                                               | Sup.2   |
| cysS_opti_22_R | AAAtgtgttcccgcaccacgaTaacgagatcgcgc                                                            | Sup.2   |
| cysS_opti_23_R | AAAtcgtgttcccgcaccacgaTaacgagatcgcgc                                                           | Sup.2   |
| cysS_opti_24_R | AAAgatctgtgttcccgcaccacgaTaacgagatcgcgc                                                        | Sup.2   |
| hsdR_UP_F      | GGAggttctctgtgttgccttGTCTTTGACTCTGGTACCAGAAG<br>CTACAAAAGATAAGGCTTCATGCCGAAATCAAC              | Fig. 1b |
| mrr_UP_F       | GGAgcagaatactgtaggcaggGTCTTTGACTCTGGTACCAGA<br>AGCTACAAAAGATAAGGCTTCATGCCGAAATCAAC             | Fig. 1b |
| hsdM_T1_UP_F   | GGAgatatttacgaaggctgtGTCTTTGACTCTGGTACCAGAA<br>GCTACAAAAGATAAGGCTTCATGCCGAAATCAAC              | Fig. 1b |
| hsdM_T2_UP_F   | GGAggtggcgaaccgaatcaggaGTCTTTGACTCTGGTACCAG<br>AAGCTACAAAAGATAAGGCTTCATGCCGAAATCAAC            | Fig. 1b |
| hsdS_T1_UP_F   | GGAgatctacatggccagcagctGTCTTTGACTCTGGTACCAGA<br>AGCTACAAAAGATAAGGCTTCATGCCGAAATCAAC            | Fig. 1b |
| hsdS_T2_UP_F   | GGAgagccgcaacattctgtattGTCTTTGACTCTGGTACCAGAA<br>GCTACAAAAGATAAGGCTTCATGCCGAAATCAAC            | Fig. 1b |
| mcrC_UP_F      | GGAgctcttgtttgacctggaGTCTTTGACTCTGGTACCAGAAG<br>CTACAAAAGATAAGGCTTCATGCCGAAATCAAC              | Fig. 1b |
| mcrA_UP_F      | GGAgctccaggaaccagttgagGTCTTTGACTCTGGTACCAGA<br>AGCTACAAAAGATAAGGCTTCATGCCGAAATCAAC             | Fig. 1b |
| araC_UP_F      | GGAgcgagttctgcccgtgtGTCTTTGACTCTGGTACCAGAA<br>GCTACAAAAGATAAGGCTTCATGCCGAAATCAAC               | Fig. 1b |
| hsdR_UP_R      | ATGACAGGGTGTGATTTCGGCATGAAGCCTTATCTTTG<br>TAGCTTCTGGTACCAGAGTACAAAAGACaaggcaaacagcagga<br>aacc | Fig. 1b |
| mrr_UP_R       | ATGACAGGGTGTGATTTCGGCATGAAGCCTTATCTTTG<br>TAGCTTCTGGTACCAGAGTACAAAAGACcctgcetacagtattctg<br>cc | Fig. 1b |
| hsdM_T1_UP_R   | ATGACAGGGTGTGATTTCGGCATGAAGCCTTATCTTTG                                                         | Fig. 1b |

|               |                                                                                                  |                                                        |
|---------------|--------------------------------------------------------------------------------------------------|--------------------------------------------------------|
|               | TAGCTTCTGGTACCAGAGTACAAAGACaacagcccttcacata<br>tc                                                |                                                        |
| hsdM_T2_UP_R  | ATGACAGGGTGGTTGATTTCGGCATGAAGCCTTATCTTTG<br>TAGCTTCTGGTACCAGAGTACAAAGACtcctgattcgggttcgcc<br>acc | Fig. 1b                                                |
| hsdS_T1_UP_R  | ATGACAGGGTGGTTGATTTCGGCATGAAGCCTTATCTTTG<br>TAGCTTCTGGTACCAGAGTACAAAGACacgtgctggccatgtag<br>atc  | Fig. 1b                                                |
| hsdS_T2_UP_R  | ATGACAGGGTGGTTGATTTCGGCATGAAGCCTTATCTTTG<br>TAGCTTCTGGTACCAGAGTACAAAGACaatacagaatgttcggg<br>ctc  | Fig. 1b                                                |
| mcrC_UP_R     | ATGACAGGGTGGTTGATTTCGGCATGAAGCCTTATCTTTG<br>TAGCTTCTGGTACCAGAGTACAAAGACtccaggccaacaagaag<br>gac  | Fig. 1b                                                |
| mcrA_UP_R     | ATGACAGGGTGGTTGATTTCGGCATGAAGCCTTATCTTTG<br>TAGCTTCTGGTACCAGAGTACAAAGACtcaactggttcctgga<br>gc    | Fig. 1b                                                |
| araC_UP_R     | ATGACAGGGTGGTTGATTTCGGCATGAAGCCTTATCTTTG<br>TAGCTTCTGGTACCAGAGTACAAAGACacaaccggcacgaaact<br>cgc  | Fig. 1b                                                |
| hsdR_Mut_F    | ACCCTGTCATTTTATGGCAGGGTGTgccattAtggaaggcaaca<br>gcagga                                           | Fig. 1b                                                |
| mrr_Mut_F     | ACCCTGTCATTTTATGGCAGGGTGTgtaattAtggcctgcctacagt<br>attc                                          | Fig. 1b                                                |
| hsdM_T1_Mut_F | ACCCTGTCATTTTATGGCAGGGTGTgttettAtgcaacagcccttcg<br>taca                                          | Fig. 1b                                                |
| hsdM_T2_Mut_F | ACCCTGTCATTTTATGGCAGGGTGTacagttAttatcctgattcgggt<br>tcg                                          | Fig. 1b                                                |
| hsdS_T1_Mut_F | ACCCTGTCATTTTATGGCAGGGTGTttagttAtgtaoigtggtccat<br>gta                                           | Fig. 1b                                                |
| hsdS_T2_Mut_F | ACCCTGTCATTTTATGGCAGGGTGTtaacttAttaatacagaatgtt<br>gcg                                           | Fig. 1b                                                |
| mcrC_Mut_F    | ACCCTGTCATTTTATGGCAGGGTGTataattAtattcaggcca<br>caaa                                              | Fig. 1b                                                |
| mcrA_Mut_F    | ACCCTGTCATTTTATGGCAGGGTGTgtctttAtacctcaactggttc<br>ctg                                           | Fig. 1b                                                |
| araC_Mut_F    | ACCCTGTCATTTTATGGCAGGGTGTctttttAttcacaaccggcacg<br>aaac                                          | Fig. 1b                                                |
| hsdR_Mut_R    | AAAtectgctgtttgcttccaTaattgcACACCCTGCCATAAA                                                      | Fig. 1b                                                |
| mrr_Mut_R     | AAAgaactcttaggcaggccaTaattacACACCCTGCCATAAA                                                      | Fig. 1b                                                |
| hsdM_T1_Mut_R | AAAgtacgaaggctgttgcaTaagaacACACCCTGCCATAAA                                                       | Fig. 1b                                                |
| hsdM_T2_Mut_R | AAAcgaaccgaatcaggataaTaactgtACACCCTGCCATAAA                                                      | Fig. 1b                                                |
| hsdS_T1_Mut_R | AAAatcatgccagcagctacaTaactaaACACCCTGCCATAAA                                                      | Fig. 1b                                                |
| hsdS_T2_Mut_R | AAAcgaacattctgtatttaaTaagttaACACCCTGCCATAAA                                                      | Fig. 1b                                                |
| mcrC_Mut_R    | AAAtttgtttgacctggaataTaattatACACCCTGCCATAAA                                                      | Fig. 1b                                                |
| mcrA_Mut_R    | AAAcaggaaccaggtgaggtataaagacACACCCTGCCATAAA                                                      | Fig. 1b                                                |
| araC_Mut_R    | AAAgttcgtgccggtgtgaaTaaagACACCCTGCCATAAA                                                         | Fig. 1b                                                |
| lacZ_F        | TAGTaatccccgaatctctatcgtgGTTTT                                                                   | Fig. 1cSup.3Sup.4Fig. 2c-<br>gSup.7Sup.8Fig. 2iFig. 3h |

|                           |                                      |                                                           |
|---------------------------|--------------------------------------|-----------------------------------------------------------|
| galK_F                    | TAGTgacagccacaccttgggcaGTTTT         | Fig. 1cSup.3Sup.4Fig. 2c-gSup.7Sup.8Fig. 2iFig. 3hFig. 4a |
| pta_F                     | TAGTAcgagcattccgacatgcGTTTT          | Fig. 1cSup.3Sup.4Fig. 2c-gSup.7Sup.8Fig. 2iFig. 3hFig. 4a |
| xylB_F                    | TAGTccccacgettgcacactcGTTTT          | Fig. 1cSup.3Sup.4Fig. 2c-gSup.7Sup.8Fig. 2iFig. 3hFig. 4a |
| adhE_F                    | TAGTctgagcgtctatcgtcGTTTT            | Fig. 1cSup.3Sup.4Fig. 2c-gSup.7Sup.8Fig. 2iFig. 3hFig. 4a |
| lacZ_R                    | gctctaaaccacatagagattcgggatt         | Fig. 1cSup.3Sup.4Fig. 2c-gSup.7Sup.8Fig. 2iFig. 3h        |
| galK_R                    | gctctaaaactcccaaaggtgtgctgctc        | Fig. 1cSup.3Sup.4Fig. 2c-gSup.7Sup.8Fig. 2iFig. 3hFig. 4a |
| pta_R                     | gctctaaaacgatgtcggaaatgctgct         | Fig. 1cSup.3Sup.4Fig. 2c-gSup.7Sup.8Fig. 2iFig. 3hFig. 4a |
| xylB_R                    | gctctaaaacgaagtgcgaaagctgggg         | Fig. 1cSup.3Sup.4Fig. 2c-gSup.7Sup.8Fig. 2iFig. 3hFig. 4a |
| adhE_R                    | gctctaaaacgagcagatagcagcctcag        | Fig. 1cSup.3Sup.4Fig. 2c-gSup.7Sup.8Fig. 2iFig. 3hFig. 4a |
| pegRNA2lacZ+5G-to-T_F     | ggtGctcaaccacAgcacgatagagattcgg      | Fig. 1cSup.3Sup.4Fig. 2c-gSup.7Sup.8Fig. 2i               |
| pegRNA2lacZ+5TTAA ins_F   | ggtGctcaaccaccTTAAgcacgatagagattcgg  | Fig. 1cSup.3Sup.4Fig. 2c-gSup.7                           |
| pegRNA2lacZ+4-6 CGG del_F | ggtGctcaaccacacgatagagattcgg         | Fig. 1cSup.3Sup.4Fig. 2c-gSup.7                           |
| pegRNA2galK+5G-to-T_F     | ggtGcgcagtttcAatgcccaaaggtgtggc      | Fig. 1cSup.3Sup.4Fig. 2c-gSup.7Sup.8Fig.2i                |
| pegRNA2galK+5TTAA ins_F   | ggtGcgcagtttcTTAAatgcccaaaggtgtggc   | Fig. 1cSup.3Sup.4Fig. 2c-gSup.7                           |
| pegRNA2galK+4-6 TGG del_F | ggtGcgcagtttgcgcaaaggtgtggc          | Fig. 1cSup.3Sup.4Fig. 2c-gSup.7                           |
| pegRNA2pta+5G-to-T_F      | ggtGcaagtgctcAagcatgtcggaaatgct      | Fig. 1cSup.3Sup.4Fig. 2c-gSup.7Sup.8Fig.2i                |
| pegRNA2pta+5TTAA ins_F    | ggtGcaagtgctcTTAAagcatgtcggaaatgct   | Fig. 1cSup.3Sup.4Fig. 2c-gSup.7                           |
| pegRNA2pta+4-6 TGG del_F  | ggtGcaagtgctcagatgtcggaaatgct        | Fig. 1cSup.3Sup.4Fig. 2c-gSup.7                           |
| pegRNA2xylB+5G-to-T_F     | ggtGctttgttacAtgaagttgcgaaagcgt      | Fig. 1cSup.3Sup.4Fig. 2c-gSup.7Sup.8Fig.2i                |
| pegRNA2xylB+5TTAA ins_F   | ggtGctttgttaccTTAAatgaagttgcgaaagcgt | Fig. 1cSup.3Sup.4Fig. 2c-gSup.7                           |
| pegRNA2xylB+4-6 AGG       | ggtGctttgttagaagttgcgaaagcgt         | Fig. 1cSup.3Sup.4Fig. 2c-                                 |

|                           |                                                 |                                            |
|---------------------------|-------------------------------------------------|--------------------------------------------|
| del_F                     |                                                 | gSup.7                                     |
| pegRNA2adhE+5G-to-T_F     | ggtGccggagcacAggcagc gatagcagcct                | Fig. 1cSup.3Sup.4Fig. 2c-gSup.7Sup.8Fig.2i |
| pegRNA2adhE+5TTAA ins_F   | ggtGccggagcaccTTAAggcagc gatagcagcct            | Fig. 1cSup.3Sup.4Fig. 2c-gSup.7            |
| pegRNA2adhE+4-6 CGG del_F | ggtGccggagcagcagc gatagcagcct                   | Fig. 1cSup.3Sup.4Fig. 2c-gSup.7            |
| pegRNA2lacZ+5G-to-T_R     | GGCCcCGaatctctatcgtgcTgtggttga                  | Fig. 1cSup.3Sup.4Fig. 2c-gSup.7Sup.8Fig.2i |
| pegRNA2lacZ+5TTAA ins_R   | GGCCcCGaatctctatcgtgcTTAAggtggttga              | Fig. 1cSup.3Sup.4Fig. 2c-gSup.7            |
| pegRNA2lacZ+4-6 CGG del_R | GGCCcCGaatctctatcgtggttga                       | Fig. 1cSup.3Sup.4Fig. 2c-gSup.7            |
| pegRNA2galK+5G-to-T_R     | GGCCgccacaccttgggcatTgaaactgc                   | Fig. 1cSup.3Sup.4Fig. 2c-gSup.7Sup.8Fig.2i |
| pegRNA2galK+5TTAA ins_R   | GGCCgccacaccttgggcatTTAAggaactgc                | Fig. 1cSup.3Sup.4Fig. 2c-gSup.7            |
| pegRNA2galK+4-6 TGG del_R | GGCCgccacaccttggcgaactgc                        | Fig. 1cSup.3Sup.4Fig. 2c-gSup.7            |
| pegRNA2pta+5G-to-T_R      | GGCCcagcattccgacatcgtTgagcactt                  | Fig. 1cSup.3Sup.4Fig. 2c-gSup.7Sup.8Fig.2i |
| pegRNA2pta+5TTAA ins_R    | GGCCcagcattccgacatcgtTTAAgagcactt               | Fig. 1cSup.3Sup.4Fig. 2c-gSup.7            |
| pegRNA2pta+4-6 TGG del_R  | GGCCcagcattccgacatcagcactt                      | Fig. 1cSup.3Sup.4Fig. 2c-gSup.7            |
| pegRNA2xylB+5G-to-T_R     | GGCCcagctttcgcaactcaTgtaacaaa                   | Fig. 1cSup.3Sup.4Fig. 2c-gSup.7Sup.8Fig.2i |
| pegRNA2xylB+5TTAA ins_R   | GGCCcagctttcgcaactcaTTAAgtaacaaa                | Fig. 1cSup.3Sup.4Fig. 2c-gSup.7            |
| pegRNA2xylB+4-6 AGG del_R | GGCCcagctttcgcaacttaacaaa                       | Fig. 1cSup.3Sup.4Fig. 2c-gSup.7            |
| pegRNA2adhE+5G-to-T_R     | GGCCcagctgctatcgtgccTgtgctcgg                   | Fig. 1cSup.3Sup.4Fig. 2c-gSup.7Sup.8Fig.2i |
| pegRNA2adhE+5TTAA ins_R   | GGCCcagctgctatcgtgccTTAAggtgctcgg               | Fig. 1cSup.3Sup.4Fig. 2c-gSup.7            |
| pegRNA2adhE+4-6 CGG del_R | GGCCcagctgctatcgtgctcgg                         | Fig. 1cSup.3Sup.4Fig. 2c-gSup.7            |
| lacZ(P+)+57_F             | AGTCCTAGGTATAATACTAGTctcgcggaaaccgacatcgcgtttt  | Fig. 1cSup.3Sup.4Fig. 3h                   |
| lacZ(P+)-66_F             | AGTCCTAGGTATAATACTAGTcagcagctagtgtgacgcgatgtttt | Fig. 1cSup.3Sup.4                          |
| galK(P+)+68_F             | AGTCCTAGGTATAATACTAGTgatcagcaatttccgcgctgtttt   | Fig. 1cSup.3Sup.4Fig. 3h                   |
| galK(P+)-49_F             | AGTCCTAGGTATAATACTAGTaaactcaaacgtaccctggtgtttt  | Fig. 1cSup.3Sup.4                          |
| pta(P+)+56_F              | AGTCCTAGGTATAATACTAGTcaagcggccaccagcagctcgtttt  | Fig. 1cSup.3Sup.4Fig. 3h                   |
| pta(P+)-69_F              | AGTCCTAGGTATAATACTAGTgatgctcctcgttgatgagtttt    | Fig. 1cSup.3Sup.4                          |
| xylB(P+)+80_F             | AGTCCTAGGTATAATACTAGTctggagtgacgctatgctcgtttt   | Fig. 1cSup.3Sup.4Fig. 3h                   |
| xylB(P+)-59_F             | AGTCCTAGGTATAATACTAGTggcgggtggcacaatgcagcgtttt  | Fig. 1cSup.3Sup.4                          |
| adhE(P+)+46_F             | AGTCCTAGGTATAATACTAGTgcttagacagttcaacagagtttt   | Fig. 1cSup.3Sup.4Fig. 3h                   |
| adhE(P+)-53_F             | AGTCCTAGGTATAATACTAGTttggtggcatctttgcacggtttt   | Fig. 1cSup.3Sup.4                          |
| lacZ(P+)+57_R             | gctctaaaacgcgatcgggttccgcgagACTAGTATTATACCTAG   | Fig. 1cSup.3Sup.4Fig. 3h                   |
| lacZ(P+)-66_R             | gctctaaaacatcgcgtcactacgtctgACTAGTATTATACCTAG   | Fig. 1cSup.3Sup.4                          |

|                                     |                                                                                                 |                          |
|-------------------------------------|-------------------------------------------------------------------------------------------------|--------------------------|
| galK(P+)+68_R                       | gctctaaaacagcgcggaaattagctgatcACTAGTATTATACCTAG                                                 | Fig. 1cSup.3Sup.4Fig. 3h |
| galK(P+)-49_R                       | gctctaaaacaccagggtactgttgaagtACTAGTATTATACCTAG                                                  | Fig. 1cSup.3Sup.4        |
| pta(P+)+56_R                        | gctctaaaacagcgtgctggtggcccttgACTAGTATTATACCTAG                                                  | Fig. 1cSup.3Sup.4Fig. 3h |
| pta(P+)-69_R                        | gctctaaaactcatcaacgaagggcagatcACTAGTATTATACCTAG                                                 | Fig. 1cSup.3Sup.4        |
| xylB(P+)+80_R                       | gctctaaaacgagcatgacgtcactccagACTAGTATTATACCTAG                                                  | Fig. 1cSup.3Sup.4Fig. 3h |
| xylB(P+)-59_R                       | gctctaaaacgctgattgtgccaccgccACTAGTATTATACCTAG                                                   | Fig. 1cSup.3Sup.4        |
| adhE(P+)+46_R                       | gctctaaaactctgtgaactgtctaagcACTAGTATTATACCTAG                                                   | Fig. 1cSup.3Sup.4Fig. 3h |
| adhE(P+)-53_R                       | gctctaaaaccgtgcaaaagatgccaccaaACTAGTATTATACCTAG                                                 | Fig. 1cSup.3Sup.4        |
| rpoB_assay_UP_F                     | ggagccagctgtctcagtttatggaGTCTTTGTACTCTGGTACCAGAA<br>GCTACAAAGATAAGGCTTCATGCCGAAATCAAC           | Fig. 2bSup.6             |
| rpoB_assay_UP_R                     | ATGACAGGGTGTGATTTCGGCATGAAGCCTTATCTTTG<br>TAGCTTCTGGTACCAGAGTACAAAGACTccataaactgagacag<br>ctggc | Fig. 2bSup.6             |
| rpoB_assay_Mut_F                    | ACCCTGTCATTTTATGGCAGGGTGTgttgtTtggtAcataaactga<br>gaca                                          | Fig. 2bSup.6             |
| rpoB_assay_Mut_R                    | aaAtgtctcagttatgTaccaAaacacACACCCTGCCATAAA                                                      | Fig. 2bSup.6             |
| pegRNA2@tevopreQ1lacZ<br>+5G-to-T_F | ggtGctcaaccacAgcacgatagagattcggAAACAATG                                                         | Fig.2i                   |
| pegRNA2@tevopreQ1galK<br>+5G-to-T_F | ggtGcgcagtttcAatgcccaaaaggtggtgcaAAATTATC                                                       | Fig.2i                   |
| pegRNA2@tevopreQ1pta+<br>5G-to-T_F  | ggtGcaagtgtcAagcattgtcgggaatgctAATAAGAT                                                         | Fig.2i                   |
| pegRNA2@tevopreQ1xylB<br>+5G-to-T_F | ggtGctttgttacAtgaagttgccaaagcgtCATTAGAG                                                         | Fig.2i                   |
| pegRNA2@tevopreQ1adh<br>E+5G-to-T_F | ggtGccggagcacAggcagcagatagcagcctAATTTAAT                                                        | Fig.2i                   |
| pegRNA2@mpknotlacZ+5<br>G-to-T_F    | ggtGctcaaccacAgcacgatagagattcggAAACAATT                                                         | Fig.2i                   |
| pegRNA2@mpknotgalK+5<br>G-to-T_F    | ggtGcgcagtttcAatgcccaaaaggtggtgcaAAATTATC                                                       | Fig.2i                   |
| pegRNA2@mpknotpta+5G<br>-to-T_F     | ggtGcaagtgtcAagcattgtcgggaatgctAATAAGAT                                                         | Fig.2i                   |
| pegRNA2@mpknotxylB+5<br>G-to-T_F    | ggtGctttgttacAtgaagttgccaaagcgtCATTAGAG                                                         | Fig.2i                   |
| pegRNA2@mpknotadhE+5<br>G-to-T_F    | ggtGccggagcacAggcagcagatagcagcctAATTTAAT                                                        | Fig.2i                   |
| pegRNA2@tevopreQ1lacZ<br>+5G-to-T_R | TCAACATTGTTTccgaatctctatcgtgcTgtggtga                                                           | Fig.2i                   |
| pegRNA2@tevopreQ1galK<br>+5G-to-T_R | TCAAGATAATTTgccacaccttgggcatTgaaactgc                                                           | Fig.2i                   |
| pegRNA2@tevopreQ1pta+<br>5G-to-T_R  | TCAAATCTTATtagcattccgcacatgctTgagcactt                                                          | Fig.2i                   |
| pegRNA2@tevopreQ1xylB<br>+5G-to-T_R | TCAACTCTAATGacgcttcgcaactcaTgtaacaaa                                                            | Fig.2i                   |
| pegRNA2@tevopreQ1adh<br>E+5G-to-T_R | TCAAATTAATTaggctgctatcgtgccTgtgctcgg                                                            | Fig.2i                   |
| pegRNA2@mpknotlacZ+5<br>G-to-T_R    | ACCCAATTGTTTccgaatctctatcgtgcTgtggtga                                                           | Fig.2i                   |
| pegRNA2@mpknotgalK+5                | ACCCGATAATTTgccacaccttgggcatTgaaactgc                                                           | Fig.2i                   |

|                                  |                                         |                     |
|----------------------------------|-----------------------------------------|---------------------|
| G-to-T_R                         |                                         |                     |
| pegRNA2@mpknotpta+5G<br>-to-T_R  | ACCCATCTTATgacattccgcacatgctTgagcactt   | Fig.2i              |
| pegRNA2@mpknotxylB+5<br>G-to-T_R | ACCCCTCTAATGacgctttgcaactcaTgtaacaaa    | Fig.2i              |
| pegRNA2@mpknotadhE+5<br>G-to-T_R | ACCCATTAAATTaggctgctatcgctgccTgtgctccg  | Fig.2i              |
| pCRISPR-sbcB_F                   | AAACtaattaccggtattacccgcG               | Fig. 2c-gSup.8Sup.9 |
| pCRISPR-tatD_F                   | AAACgttaatgggctactcatcacG               | Sup.8               |
| pCRISPR-mutS_F                   | AAACccgagatcctgctgttttacG               | Fig.1cFig. 2c-g     |
| pCRISPR-xthA_F                   | AAACgtgacgacgaagaggcagG                 | Sup.8               |
| pCRISPR-xseA_F                   | AAACgtgacctcccccacagcaG                 | Fig. 2c-gSup.9      |
| pCRISPR-ygdG(xni)_F              | AAACtctgctcattcatgctgtcG                | Sup.8               |
| pCRISPR-exoX_F                   | AAACgcctctgttgatgctattgaG               | Fig. 2c-g           |
| pCRISPR-sbcC_F                   | AAACcctgctgagcgcattgtcG                 | Sup.8               |
| pCRISPR-recJ_F                   | AAACgtgttaaaggtatgctcccG                | Fig. 2c-g           |
| pCRISPR-nfo_F                    | AAACacatccggtcactgaagctcG               | Sup.8               |
| pCRISPR-sbcB_R                   | AAAACgcgggtaataccgtaatta                | Fig. 2c-gSup.8Sup.9 |
| pCRISPR-tatD_R                   | AAAACgtgatgagtagccattaac                | Sup.8               |
| pCRISPR-mutS_R                   | AAAACgtaaacagcaggatctcgg                | Fig.1cFig. 2c-g     |
| pCRISPR-xthA_R                   | AAAACtctgctctctctgctgac                 | Sup.8               |
| pCRISPR-xseA_R                   | AAAACtctgctggcggaaggtcac                | Fig. 2c-gSup.9      |
| pCRISPR-ygdG(xni)_R              | AAAACgaacggcatgaatgagcaga               | Sup.8               |
| pCRISPR-exoX_R                   | AAAACtcaatgacatcaacagagcc               | Fig. 2c-g           |
| pCRISPR-sbcC_R                   | AAAACgacaaatggcgtccagcagg               | Sup.8               |
| pCRISPR-recJ_R                   | AAAACgggagcataaccttaaac                 | Fig. 2c-g           |
| pCRISPR-nfo_R                    | AAAACgagcttcagtgaccggatgt               | Sup.8               |
| FAM-vitro1                       | CCATAGGCTGGCCCCC CTGACGAGCATCA          | Sup.9b              |
| vitro2                           | aaggcgacatcaactcgt                      | Sup.9b              |
| vitro3                           | cgagtattgatgctgcttcGGGGGccAGCCTATGG     | Sup.9b              |
| ddCpfl@sbcB_T1_F                 | GTAGATacctaataatgatgaatgacggtaagTTTTTTT | Sup.10              |
| ddCpfl@sbcB_T2_F                 | GTAGATacgattacgaaaccttggcagTTTTTTT      | Sup.10              |
| ddCpfl@xseA_T1_F                 | GTAGATgaattgatctgctcacatgtTTTTTTT       | Sup.10              |
| ddCpfl@xseA_T2_F                 | GTAGATatctctgctcacatgttacctctTTTTTTT    | Sup.10              |
| ddCpfl@exoX_T1_F                 | GTAGATcactatgaaactggccgctgtTTTTTTT      | Sup.10              |
| ddCpfl@exoX_T2_F                 | GTAGATtgccctggatcaagtacagcaaTTTTTTT     | Sup.10              |
| ddCpfl@sbcB_T1_R                 | ctcaaaaaaactaccgtcattcatcattaggAT       | Sup.10              |
| ddCpfl@sbcB_T2_R                 | ctcaaaaaaacgtccaaagttcgtaatcgtAT        | Sup.10              |
| ddCpfl@xseA_T1_R                 | ctcaaaaaaacatgtgagcgagatcaaatcAT        | Sup.10              |
| ddCpfl@xseA_T2_R                 | ctcaaaaaaagaaggtaacatgtgagcgagatAT      | Sup.10              |
| ddCpfl@exoX_T1_R                 | ctcaaaaaaacgacggcagttcatatgtAT          | Sup.10              |
| ddCpfl@exoX_T2_R                 | ctcaaaaaaattgctgtactgtaccaggccaAT       | Sup.10              |
| qPCR_sbcB_F                      | gctctgggattactggatg                     | Sup.10              |
| qPCR_sbcB_R                      | cagcttggccatcgaatag                     | Sup.10              |
| qPCR_xseA_F                      | agtgagccgtaatcagcaag                    | Sup.10              |
| qPCR_xseA_R                      | tccagcgcaaaagctcattc                    | Sup.10              |
| qPCR_exoX_F                      | ttgacggaaaaatcgtcaac                    | Sup.10              |
| qPCR_exoX_R                      | ttcatagtcaaatccactc                     | Sup.10              |



|                   |                                               |           |
|-------------------|-----------------------------------------------|-----------|
| qPCR_idnT_F       | GTGCGCCTCTTCTTTGAATTT                         | Sup.10    |
| qPCR_idnT_R       | TCGATGGTGCCTCCATTAC                           | Sup.10    |
| EMxylB+1T-to-A_F  | gtGcctttgttacctgaTgttgcgaaagcgtCTCCATTG       | Fig. 3b-d |
| EMxylB+1T-to-G_F  | gtGcctttgttacctgaCgttgcgaaagcgtCTCTTTCC       | Fig. 3b-d |
| EMxylB+1T-to-C_F  | gtGcctttgttacctgaGgttgcgaaagcgtTTAAGAAT       | Fig. 3b-d |
| EMxylB+2T-to-A_F  | gtGcctttgttacctgTagttgcgaaagcgtTCAAAGAT       | Fig. 3b-d |
| EMxylB+2T-to-G_F  | gtGcctttgttacctgCagttgcgaaagcgtTCAAAGAT       | Fig. 3b-d |
| EMxylB+2T-to-C_F  | gtGcctttgttacctgGagttgcgaaagcgtCCACATTT       | Fig. 3b-d |
| EMxylB+3C-to-A_F  | gtGcctttgttacctTaagttgcgaaagcgtTAAGACCT       | Fig. 3b-d |
| EMxylB+3C-to-G_F  | gtGcctttgttacctCaagttgcgaaagcgtTGATCTCA       | Fig. 3b-d |
| EMxylB+3C-to-T_F  | gtGcctttgttacctAaagttgcgaaagcgtTAAAGAAA       | Fig. 3b-d |
| EMxylB+4A-to-G_F  | gtGcctttgttacctCgaagttgcgaaagcgtCCATTATA      | Fig. 3b-d |
| EMxylB+4A-to-C_F  | gtGcctttgttacctGgaagttgcgaaagcgtCCATTATC      | Fig. 3b-d |
| EMxylB+4A-to-T_F  | gtGcctttgttacctAgaagttgcgaaagcgtATCAAAGA      | Fig. 3b-d |
| EMxylB+5G-to-A_F  | gtGcctttgttacctTgaagttgcgaaagcgtTCATCTAC      | Fig. 3b-d |
| EMxylB+5G-to-C_F  | gtGcctttgttacctGtgaagttgcgaaagcgtTAAAGATC     | Fig. 3b-d |
| EMxylB+5G-to-T_F  | gtGcctttgttacctAtgaagttgcgaaagcgtCATACCAA     | Fig. 3b-d |
| EMxylB+6G-to-A_F  | gtGcctttgttacctTctgaagttgcgaaagcgtTCCATGAT    | Fig. 3b-d |
| EMxylB+6G-to-C_F  | gtGcctttgttacctGctgaagttgcgaaagcgtTCATTCTA    | Fig. 3b-d |
| EMxylB+6G-to-T_F  | gtGcctttgttacctActgaagttgcgaaagcgtTCAATCCA    | Fig. 3b-d |
| EMxylB+7T-to-A_F  | gtGcctttgttacctTcctgaagttgcgaaagcgtTCATACCG   | Fig. 3b-d |
| EMxylB+7T-to-G_F  | gtGcctttgttacctCctgaagttgcgaaagcgtTCAATATA    | Fig. 3b-d |
| EMxylB+7T-to-C_F  | gtGcctttgttacctGcctgaagttgcgaaagcgtTCAAGATG   | Fig. 3b-d |
| EMxylB+8A-to-G_F  | gtGcctttgttacctCacgaagttgcgaaagcgtTCAATAGA    | Fig. 3b-d |
| EMxylB+8A-to-C_F  | gtGcctttgttacctGacgaagttgcgaaagcgtTAAATATT    | Fig. 3b-d |
| EMxylB+8A-to-T_F  | gtGcctttgttacctAacgaagttgcgaaagcgtTCCCAAG     | Fig. 3b-d |
| EMxylB+1T ins_F   | gtGcctttgttacctgaaAgttgcgaaagcgtTCATCTAA      | Fig. 3b-d |
| EMxylB+1TA ins_F  | gtGcctttgttacctgaaTAgttgcgaaagcgtTCATACCG     | Fig. 3b-d |
| EMxylB+1TAA ins_F | gtGcctttgttacctgaaTTAgttgcgaaagcgtATTGATA     | Fig. 3b-d |
| EMxylB+2T ins_F   | gtGcctttgttacctgaAagttgcgaaagcgtTCATCTAA      | Fig. 3b-d |
| EMxylB+2TA ins_F  | gtGcctttgttacctgaTAagttgcgaaagcgtTCCAAAGA     | Fig. 3b-d |
| EMxylB+2TAA ins_F | gtGcctttgttacctgaaTTAagttgcgaaagcgtTCAAAGAC   | Fig. 3b-d |
| EMxylB+3T ins_F   | gtGcctttgttacctgAaagttgcgaaagcgtTCATCTAA      | Fig. 3b-d |
| EMxylB+3TA ins_F  | gtGcctttgttacctgTAaagttgcgaaagcgtTTCAGAAT     | Fig. 3b-d |
| EMxylB+3TAA ins_F | gtGcctttgttacctgTTAaagttgcgaaagcgtTATAGATC    | Fig. 3b-d |
| EMxylB+4T ins_F   | gtGcctttgttacctAgaagttgcgaaagcgtCTAGTCCG      | Fig. 3b-d |
| EMxylB+4TA ins_F  | gtGcctttgttacctAgaagttgcgaaagcgtTCTACCCA      | Fig. 3b-d |
| EMxylB+4TAA ins_F | gtGcctttgttacctTTAaagttgcgaaagcgtTTAAATAT     | Fig. 3b-d |
| EMxylB+5T ins_F   | gtGcctttgttacctAtgaagttgcgaaagcgtTCAAATTG     | Fig. 3b-d |
| EMxylB+5TA ins_F  | gtGcctttgttacctATgaagttgcgaaagcgtTCAGTCCT     | Fig. 3b-d |
| EMxylB+5TAA ins_F | gtGcctttgttacctTTAgaagttgcgaaagcgtTCATCTTA    | Fig. 3b-d |
| EMxylB+6T ins_F   | gtGcctttgttacctActgaagttgcgaaagcgtTCAATTAC    | Fig. 3b-d |
| EMxylB+6TA ins_F  | gtGcctttgttacctTActgaagttgcgaaagcgtTTAAATTC   | Fig. 3b-d |
| EMxylB+6TAA ins_F | gtGcctttgttacctTTActgaagttgcgaaagcgtTAATAATA  | Fig. 3b-d |
| EMxylB+7T ins_F   | gtGcctttgttacctAcctgaagttgcgaaagcgtTCAAATCC   | Fig. 3b-d |
| EMxylB+7TA ins_F  | gtGcctttgttacctTAcctgaagttgcgaaagcgtTTCATTC   | Fig. 3b-d |
| EMxylB+7TAA ins_F | gtGcctttgttacctTTAcctgaagttgcgaaagcgtTTCACCTC | Fig. 3b-d |
| EMxylB+8T ins_F   | gtGcctttgttacctAacctgaagttgcgaaagcgtTCAAATCC  | Fig. 3b-d |

|                      |                                            |           |
|----------------------|--------------------------------------------|-----------|
| EMxylB+8TA ins_F     | gtGcctttgtTAacctgaagttgcgaaagcgtTCAAATTG   | Fig. 3b-d |
| EMxylB+8TAA ins_F    | gtGcctttgtTTAAacctgaagttgcgaaagcgtTCATGATA | Fig. 3b-d |
| EMxylB+1T del_F      | gtGcctttgtacctgagttgcgaaagcgtTCAGCCTA      | Fig. 3b-d |
| EMxylB+1-2TT del_F   | gtGcctttgtacctggttgcgaaagcgtTACAAAGC       | Fig. 3b-d |
| EMxylB+1-3TTC del_F  | gtGcctttgtacctggttgcgaaagcgtATCAAAGC       | Fig. 3b-d |
| EMxylB+2T del_F      | gtGcctttgtacctgagttgcgaaagcgtTCAGCCTA      | Fig. 3b-d |
| EMxylB+2-3TC del_F   | gtGcctttgtacctagttgcgaaagcgtTATAAAGT       | Fig. 3b-d |
| EMxylB+2-4TCA del_F  | gtGcctttgtaccagttgcgaaagcgtTGAATCAC        | Fig. 3b-d |
| EMxylB+3C del_F      | gtGcctttgtacctaaagttgcgaaagcgtTAGAAACC     | Fig. 3b-d |
| EMxylB+3-4CA del_F   | gtGcctttgtaccagttgcgaaagcgtAACGAAGA        | Fig. 3b-d |
| EMxylB+3-5CAG del_F  | gtGcctttgtacaagttgcgaaagcgtTACAGAGC        | Fig. 3b-d |
| EMxylB+4A del_F      | gtGcctttgtaccgaagttgcgaaagcgtCCCTATTA      | Fig. 3b-d |
| EMxylB+4-5AG del_F   | gtGcctttgtaccgaagttgcgaaagcgtCCAAACAG      | Fig. 3b-d |
| EMxylB+4-6AGG del_F  | gtGcctttgttagaagttgcgaaagcgtCTAGTCTC       | Fig. 3b-d |
| EMxylB+5G del_F      | gtGcctttgttactgaagttgcgaaagcgtTCAGCCTC     | Fig. 3b-d |
| EMxylB+5-6GG del_F   | gtGcctttgttatgaagttgcgaaagcgtTCAGTTAA      | Fig. 3b-d |
| EMxylB+5-7GGT del_F  | gtGcctttgtttgaagttgcgaaagcgtTCATCCTG       | Fig. 3b-d |
| EMxylB+6G del_F      | gtGcctttgttactgaagttgcgaaagcgtTCAGCCTC     | Fig. 3b-d |
| EMxylB+6-7GT del_F   | gtGcctttgttctgaagttgcgaaagcgtTCATACCT      | Fig. 3b-d |
| EMxylB+6-8GTA del_F  | gtGcctttgtctgaagttgcgaaagcgtTCATGTAA       | Fig. 3b-d |
| EMxylB+7T del_F      | gtGcctttgttctgaagttgcgaaagcgtTCAATCAA      | Fig. 3b-d |
| EMxylB+7-8TA del_F   | gtGcctttgtctctgaagttgcgaaagcgtTCATTAAG     | Fig. 3b-d |
| EMxylB+7-9TAA del_F  | gtGcctttgtcctgaagttgcgaaagcgtTCATTATC      | Fig. 3b-d |
| EMxylB+8A del_F      | gtGcctttgtacctgaagttgcgaaagcgtTCATGAAT     | Fig. 3b-d |
| EMxylB+8-9AA del_F   | gtGcctttgtacctgaagttgcgaaagcgtTCAATGAA     | Fig. 3b-d |
| EMxylB+8-10AAC del_F | gtGcctttgtacctgaagttgcgaaagcgtTCAATAAC     | Fig. 3b-d |
| EMxylB+1T-to-A_R     | TCAACAATGGAGacgcttgcgaacAacagtaacaaag      | Fig. 3b-d |
| EMxylB+1T-to-G_R     | TCAAGGAAAGAGacgcttgcgaacGtcagtaacaaag      | Fig. 3b-d |
| EMxylB+1T-to-C_R     | TCAAATCTTAAacgcttgcgaacCtcagtaacaaag       | Fig. 3b-d |
| EMxylB+2T-to-A_R     | TCAAATCTTTGAacgcttgcgaactAcagtaacaaag      | Fig. 3b-d |
| EMxylB+2T-to-G_R     | TCAAATCTTTGAacgcttgcgaactCgagtaacaaag      | Fig. 3b-d |
| EMxylB+2T-to-C_R     | TCAAAAATGTGAcgcttgcgaactCagtaacaaag        | Fig. 3b-d |
| EMxylB+3C-to-A_R     | TCAAAGGTCTTAacgcttgcgaactAagtaacaaag       | Fig. 3b-d |
| EMxylB+3C-to-G_R     | TCAATGAGATCAacgcttgcgaactGagtaacaaag       | Fig. 3b-d |
| EMxylB+3C-to-T_R     | TCAATTTCTTTAacgcttgcgaactTagtaacaaag       | Fig. 3b-d |
| EMxylB+4A-to-G_R     | TCAATATAATGGAcgcttgcgaactGgtaacaaag        | Fig. 3b-d |
| EMxylB+4A-to-C_R     | TCAAGATAATGGAcgcttgcgaactCgtaacaaag        | Fig. 3b-d |
| EMxylB+4A-to-T_R     | TCAATCTTTGATacgcttgcgaactTgtaacaaag        | Fig. 3b-d |
| EMxylB+5G-to-A_R     | TCAAGTAGATGActtggttacTgaagttgcgaaagcgt     | Fig. 3b-d |
| EMxylB+5G-to-C_R     | TCAAGATCTTTAacgcttgcgaactCgtaacaaag        | Fig. 3b-d |
| EMxylB+5G-to-T_R     | TCAATTTGGTATGacgcttgcgaactcaTgtaacaaag     | Fig. 3b-d |
| EMxylB+6G-to-A_R     | TCAAATCATGGAacgcttgcgaactcagAaacaag        | Fig. 3b-d |
| EMxylB+6G-to-C_R     | TCAATAGAATGAacgcttgcgaactcagCtaacaag       | Fig. 3b-d |
| EMxylB+6G-to-T_R     | TCAATGGATTGAacgcttgcgaactcagTtaacaag       | Fig. 3b-d |
| EMxylB+7T-to-A_R     | TCAACGGTATGAacgcttgcgaactcaggAaacaag       | Fig. 3b-d |
| EMxylB+7T-to-G_R     | TCAATATATTGAacgcttgcgaactcaggGaacaag       | Fig. 3b-d |
| EMxylB+7T-to-C_R     | TCAACATCTTGAacgcttgcgaactcaggCaacaag       | Fig. 3b-d |
| EMxylB+8A-to-G_R     | TCAATCTATTGAacgcttgcgaactcaggGacaag        | Fig. 3b-d |

|                     |                                         |           |
|---------------------|-----------------------------------------|-----------|
| EMxylB+8A-to-C_R    | TCAAAATATTTAacgcttcgcaactcaggtCacaaag   | Fig. 3b-d |
| EMxylB+8A-to-T_R    | TCAACTTGGGAacgcttcgcaactcaggtTacaaag    | Fig. 3b-d |
| EMxylB+1T ins_R     | TCAATTAGATGAacgcttcgcaacTtcaggtacaaag   | Fig. 3b-d |
| EMxylB+1TA ins_R    | TCAACGGTATGAacgcttcgcaacTAttcaggtacaaag | Fig. 3b-d |
| EMxylB+1TAA ins_R   | TCAATATCGAATacgcttcgcaacTAAtcaggtacaaag | Fig. 3b-d |
| EMxylB+2T ins_R     | TCAATTAGATGAacgcttcgcaactTtcaggtacaaag  | Fig. 3b-d |
| EMxylB+2TA ins_R    | TCAATCTTTGGAacgcttcgcaactTAtcaggtacaaag | Fig. 3b-d |
| EMxylB+2TAA ins_R   | TCAAGCTTTGAacgcttcgcaactTAAtcaggtacaaag | Fig. 3b-d |
| EMxylB+3T ins_R     | TCAATTAGATGAacgcttcgcaactTcaggtacaaag   | Fig. 3b-d |
| EMxylB+3TA ins_R    | TCAAATCTGAAacgcttcgcaactTAcaggtacaaag   | Fig. 3b-d |
| EMxylB+3TAA ins_R   | TCAAGATCTATAacgcttcgcaactTAAcaggtacaaag | Fig. 3b-d |
| EMxylB+4T ins_R     | TCAACGGACTAGacgcttcgcaactTcaggtacaaag   | Fig. 3b-d |
| EMxylB+4TA ins_R    | TCAATGGGTAGAacgcttcgcaactTAAggtacaaag   | Fig. 3b-d |
| EMxylB+4TAA ins_R   | TCAAATATTTAacgcttcgcaactTAAaggtacaaag   | Fig. 3b-d |
| EMxylB+5T ins_R     | TCAACAATTTGAacgcttcgcaactTcaggtacaaag   | Fig. 3b-d |
| EMxylB+5TA ins_R    | TCAAAGGACTGAacgcttcgcaactTcaggtacaaag   | Fig. 3b-d |
| EMxylB+5TAA ins_R   | TCAATAAGATGAacgcttcgcaactTcaggtacaaag   | Fig. 3b-d |
| EMxylB+6T ins_R     | TCAAGTAATTGAacgcttcgcaactTcaggtacaaag   | Fig. 3b-d |
| EMxylB+6TA ins_R    | TCAAGAATTTAacgcttcgcaactTcaggtacaaag    | Fig. 3b-d |
| EMxylB+6TAA ins_R   | TCAATATTATTAacgcttcgcaactTcaggtacaaag   | Fig. 3b-d |
| EMxylB+7T ins_R     | TCAAGGATTTGAacgcttcgcaactTcaggtacaaag   | Fig. 3b-d |
| EMxylB+7TA ins_R    | TCAAGAATTGAacgcttcgcaactTcaggtacaaag    | Fig. 3b-d |
| EMxylB+7TAA ins_R   | TCAAGAGGTGAacgcttcgcaactTcaggtacaaag    | Fig. 3b-d |
| EMxylB+8T ins_R     | TCAAGGATTTGAacgcttcgcaactTcaggtacaaag   | Fig. 3b-d |
| EMxylB+8TA ins_R    | TCAACAATTTGAacgcttcgcaactTcaggtacaaag   | Fig. 3b-d |
| EMxylB+8TAA ins_R   | TCAATATCATGAacgcttcgcaactTcaggtacaaag   | Fig. 3b-d |
| EMxylB+1T del_R     | TCAATAGGCTGAacgcttcgcaactcaggtacaaag    | Fig. 3b-d |
| EMxylB+1-2TT del_R  | TCAAGCTTTGTAacgcttcgcaaccaggtacaaag     | Fig. 3b-d |
| EMxylB+1-3TTC del_R | TCAAGCTTTGATacgcttcgcaaccaggtacaaag     | Fig. 3b-d |
| EMxylB+2T del_R     | TCAATAGGCTGAacgcttcgcaactcaggtacaaag    | Fig. 3b-d |
| EMxylB+2-3TC del_R  | TCAAACCTTTATAacgcttcgcaactcaggtacaaag   | Fig. 3b-d |
| EMxylB+2-4TCA del_R | TCAAGTGATTCaagcttcgcaactcaggtacaaag     | Fig. 3b-d |
| EMxylB+3C del_R     | TCAAGGTTTCTAacgcttcgcaactcaggtacaaag    | Fig. 3b-d |
| EMxylB+3-4CA del_R  | TCAATCTTCGTacgcttcgcaactcaggtacaaag     | Fig. 3b-d |
| EMxylB+3-5CAG del_R | TCAAGCTCTGTAacgcttcgcaactcaggtacaaag    | Fig. 3b-d |
| EMxylB+4A del_R     | TCAATAATAGGGacgcttcgcaactcaggtacaaag    | Fig. 3b-d |
| EMxylB+4-5AG del_R  | TCAACTGTTTGGacgcttcgcaactcaggtacaaag    | Fig. 3b-d |
| EMxylB+4-6AGG del_R | TCAAGAGACTAGacgcttcgcaactcaggtacaaag    | Fig. 3b-d |
| EMxylB+5G del_R     | TCAAGAGGCTGAacgcttcgcaactcaggtacaaag    | Fig. 3b-d |
| EMxylB+5-6GG del_R  | TCAATTAAGTGAacgcttcgcaactcaggtacaaag    | Fig. 3b-d |
| EMxylB+5-7GGT del_R | TCAACAGGATGAacgcttcgcaactcaggtacaaag    | Fig. 3b-d |
| EMxylB+6G del_R     | TCAAGAGGCTGAacgcttcgcaactcaggtacaaag    | Fig. 3b-d |
| EMxylB+6-7GT del_R  | TCAAAGGTATGAacgcttcgcaactcaggtacaaag    | Fig. 3b-d |
| EMxylB+6-8GTA del_R | TCAATTACATGAacgcttcgcaactcaggtacaaag    | Fig. 3b-d |
| EMxylB+7T del_R     | TCAATTGATGAacgcttcgcaactcaggtacaaag     | Fig. 3b-d |
| EMxylB+7-8TA del_R  | TCAACTTAATGAacgcttcgcaactcaggtacaaag    | Fig. 3b-d |
| EMxylB+7-9TAA del_R | TCAAGATAATGAacgcttcgcaactcaggtacaaag    | Fig. 3b-d |
| EMxylB+8A del_R     | TCAAATTCATGAacgcttcgcaactcaggtacaaag    | Fig. 3b-d |

|                      |                                                               |           |
|----------------------|---------------------------------------------------------------|-----------|
| EMxylB+8-9AA del_R   | TCAATTCATTGAacgctttcgcaacttcaggtcaaag                         | Fig. 3b-d |
| EMxylB+8-10AAC del_R | TCAAGTTATTGAacgctttcgcaacttcaggttaaag                         | Fig. 3b-d |
| EMlacZ+6GT_F         | TAGTaatcccgaatctctatctgtGTTTT                                 | Fig. 3e-g |
| EMrpoB+6GT_F         | TAGTcagccagctgtctcagtttaGTTTT                                 | Fig. 3e-g |
| EMxylB+5GT_F         | TAGTcccacgctttcgcaacttcGTTTT                                  | Fig. 3e-g |
| EMlacZ+6GT_R         | gctctaaaaccacgatagagattcgggatt                                | Fig. 3e-g |
| EMrpoB+6GT_R         | gctctaaaactaaactgagacagctggctg                                | Fig. 3e-g |
| EMxylB+5GT_R         | gctctaaaacgaagtgcgaaagcgtgggg                                 | Fig. 3e-g |
| EMlacZ+6GTRTT=8_F    | ggtGccaAcgcacgatagagattcggAAACAAGC                            | Fig. 3e-g |
| EMlacZ+6GTRTT=9_F    | ggtGcccaAcgcacgatagagattcggAACATAAT                           | Fig. 3e-g |
| EMlacZ+6GTRTT=10_F   | ggtGcaccaAcgcacgatagagattcggAACACATA                          | Fig. 3e-g |
| EMlacZ+6GTRTT=11_F   | ggtGcaaccaAcgcacgatagagattcggAACATAA                          | Fig. 3e-g |
| EMlacZ+6GTRTT=12_F   | ggtGccaaccaAcgcacgatagagattcggAAACAATA                        | Fig. 3e-g |
| EMlacZ+6GTRTT=13_F   | ggtGctcaaccaAcgcacgatagagattcggAAACAATG                       | Fig. 3e-g |
| EMlacZ+6GTRTT=14_F   | ggtGctcaaccaAcgcacgatagagattcggAAACAAGA                       | Fig. 3e-g |
| EMlacZ+6GTRTT=15_F   | ggtGcgtcaaccaAcgcacgatagagattcggACCAACTA                      | Fig. 3e-g |
| EMlacZ+6GTRTT=16_F   | ggtGcagttcaaccaAcgcacgatagagattcggAAACATAC                    | Fig. 3e-g |
| EMlacZ+6GTRTT=17_F   | ggtGccagttcaaccaAcgcacgatagagattcggAAACAAAT                   | Fig. 3e-g |
| EMlacZ+6GTRTT=18_F   | ggtGcgcagttcaaccaAcgcacgatagagattcggAAACAAAT                  | Fig. 3e-g |
| EMlacZ+6GTRTT=19_F   | ggtGctgcagttcaaccaAcgcacgatagagattcggTACAATAA                 | Fig. 3e-g |
| EMlacZ+6GTRTT=20_F   | ggtGcgtgcagttcaaccaAcgcacgatagagattcggACAGCAAAG               | Fig. 3e-g |
| EMlacZ+6GTRTT=21_F   | ggtGctgtgcagttcaaccaAcgcacgatagagattcggAACAAATG               | Fig. 3e-g |
| EMlacZ+6GTRTT=22_F   | ggtGcgtgtgcagttcaaccaAcgcacgatagagattcggACATAATG              | Fig. 3e-g |
| EMlacZ+6GTRTT=23_F   | ggtGcgggtgcagttcaaccaAcgcacgatagagattcggCAAAC AAT             | Fig. 3e-g |
| EMlacZ+6GTRTT=24_F   | ggtGcgggtgtgcagttcaaccaAcgcacgatagagattcggACAAAGTG            | Fig. 3e-g |
| EMlacZ+6GTRTT=25_F   | ggtGcgcggtgtgcagttcaaccaAcgcacgatagagattcggACATAAGT           | Fig. 3e-g |
| EMlacZ+6GTRTT=26_F   | ggtGcggcggtgtgcagttcaaccaAcgcacgatagagattcggACATATGC          | Fig. 3e-g |
| EMlacZ+6GTRTT=27_F   | ggtGccggcggtgtgcagttcaaccaAcgcacgatagagattcggAACAATAA         | Fig. 3e-g |
| EMlacZ+6GTRTT=28_F   | ggtGctcggcggtgtgcagttcaaccaAcgcacgatagagattcggAACATATA        | Fig. 3e-g |
| EMlacZ+6GTRTT=29_F   | ggtGctcggcggtgtgcagttcaaccaAcgcacgatagagattcggCCCAGTA<br>C    | Fig. 3e-g |
| EMlacZ+6GTRTT=30_F   | ggtGcccgaatctctatctgtcgtTtggtgaactgcacaccgccgacgCAACAAC<br>A  | Fig. 3e-g |
| EMlacZ+6GTRTT=31_F   | ggtGcccgtcggcggtgtgcagttcaaccaAcgcacgatagagattcggTTAAAC<br>AC | Fig. 3e-g |
| EMrpoB+6GTRTT=8_F    | ggtGcgggtAcataaactgagacagctATAATTAC                           | Fig. 3e-g |
| EMrpoB+6GTRTT=9_F    | ggtGctgggtAcataaactgagacagctATATAATG                          | Fig. 3e-g |
| EMrpoB+6GTRTT=10_F   | ggtGcctgggtAcataaactgagacagctAAATTAAG                         | Fig. 3e-g |
| EMrpoB+6GTRTT=11_F   | ggtGctctgggtAcataaactgagacagctACAAATTA                        | Fig. 3e-g |
| EMrpoB+6GTRTT=12_F   | ggtGcttctgggtAcataaactgagacagctACATAAAT                       | Fig. 3e-g |
| EMrpoB+6GTRTT=13_F   | ggtGcgttctgggtAcataaactgagacagctATAATTAT                      | Fig. 3e-g |
| EMrpoB+6GTRTT=14_F   | ggtGctgttctgggtAcataaactgagacagctAATCCCTT                     | Fig. 3e-g |
| EMrpoB+6GTRTT=15_F   | ggtGctgttctgggtAcataaactgagacagctTTAAATCG                     | Fig. 3e-g |
| EMrpoB+6GTRTT=16_F   | ggtGcgttctgggtAcataaactgagacagctAATTCCAC                      | Fig. 3e-g |
| EMrpoB+6GTRTT=17_F   | ggtGcgttctgggtAcataaactgagacagctTAAATCCG                      | Fig. 3e-g |
| EMrpoB+6GTRTT=18_F   | ggtGcgggttctgggtAcataaactgagacagctATATAGAC                    | Fig. 3e-g |
| EMrpoB+6GTRTT=19_F   | ggtGccgggttctgggtAcataaactgagacagctATATAATT                   | Fig. 3e-g |
| EMrpoB+6GTRTT=20_F   | ggtGcgcgggttctgggtAcataaactgagacagctATTAACAT                  | Fig. 3e-g |

|                    |                                                              |           |
|--------------------|--------------------------------------------------------------|-----------|
| EMrpoB+6GTRTT=21_F | ggtGcagcgggtgttctggtAcataaactgagacagctATAGATCG               | Fig. 3e-g |
| EMrpoB+6GTRTT=22_F | ggtGccagcgggtgttctggtAcataaactgagacagctATAACAAA              | Fig. 3e-g |
| EMrpoB+6GTRTT=23_F | ggtGcacagcgggtgttctggtAcataaactgagacagctATAATATA             | Fig. 3e-g |
| EMrpoB+6GTRTT=24_F | ggtGcgacagcgggtgttctggtAcataaactgagacagctAATTAGAC            | Fig. 3e-g |
| EMrpoB+6GTRTT=25_F | ggtGcacagcgggtgttctggtAcataaactgagacagctAATAATAT             | Fig. 3e-g |
| EMrpoB+6GTRTT=26_F | ggtGccagacagcgggtgttctggtAcataaactgagacagctAATAACAT          | Fig. 3e-g |
| EMrpoB+6GTRTT=27_F | ggtGctcagacagcgggtgttctggtAcataaactgagacagctATATAGAT         | Fig. 3e-g |
| EMrpoB+6GTRTT=28_F | ggtGcctcagacagcgggtgttctggtAcataaactgagacagctAATTATAC        | Fig. 3e-g |
| EMrpoB+6GTRTT=29_F | ggtGctctcagacagcgggtgttctggtAcataaactgagacagctAAATTATA       | Fig. 3e-g |
| EMrpoB+6GTRTT=30_F | ggtGcatctcagacagcgggtgttctggtAcataaactgagacagctATAAATAT      | Fig. 3e-g |
| EMrpoB+6GTRTT=31_F | ggtGcaatctcagacagcgggtgttctggtAcataaactgagacagctATAAATA<br>C | Fig. 3e-g |
| EMxylB+6GTRTT=8_F  | ggtGctacAtgaagttgcgaaagcgtTCAATTAA                           | Fig. 3e-g |
| EMxylB+6GTRTT=9_F  | ggtGcttacAtgaagttgcgaaagcgtTCAAATAG                          | Fig. 3e-g |
| EMxylB+6GTRTT=10_F | ggtGcgttacAtgaagttgcgaaagcgtCATATATA                         | Fig. 3e-g |
| EMxylB+6GTRTT=11_F | ggtGctgttacAtgaagttgcgaaagcgtTCAAGATC                        | Fig. 3e-g |
| EMxylB+6GTRTT=12_F | ggtGctgttacAtgaagttgcgaaagcgtTCATACTC                        | Fig. 3e-g |
| EMxylB+6GTRTT=13_F | ggtGctgttacAtgaagttgcgaaagcgtCATTAGAG                        | Fig. 3e-g |
| EMxylB+6GTRTT=14_F | ggtGcctgttacAtgaagttgcgaaagcgtCATACCAA                       | Fig. 3e-g |
| EMxylB+6GTRTT=15_F | ggtGcgtgttacAtgaagttgcgaaagcgtCCTAGAGT                       | Fig. 3e-g |
| EMxylB+6GTRTT=16_F | ggtGctgtgttacAtgaagttgcgaaagcgtTTATCAAC                      | Fig. 3e-g |
| EMxylB+6GTRTT=17_F | ggtGctgtgttacAtgaagttgcgaaagcgtTCCCGAGT                      | Fig. 3e-g |
| EMxylB+6GTRTT=18_F | ggtGcgtgtgttacAtgaagttgcgaaagcgtATAATAGA                     | Fig. 3e-g |
| EMxylB+6GTRTT=19_F | ggtGctgtgtgttacAtgaagttgcgaaagcgtAAATATCC                    | Fig. 3e-g |
| EMxylB+6GTRTT=20_F | ggtGcctgtgtgttacAtgaagttgcgaaagcgtAAATAAAT                   | Fig. 3e-g |
| EMxylB+6GTRTT=21_F | ggtGcactggtgtgttacAtgaagttgcgaaagcgtATACATCC                 | Fig. 3e-g |
| EMxylB+6GTRTT=22_F | ggtGctactggtgtgttacAtgaagttgcgaaagcgtAAATATCC                | Fig. 3e-g |
| EMxylB+6GTRTT=23_F | ggtGctactggtgtgttacAtgaagttgcgaaagcgtTTACACAC                | Fig. 3e-g |
| EMxylB+6GTRTT=24_F | ggtGcattactggtgtgttacAtgaagttgcgaaagcgtAAATATTG              | Fig. 3e-g |
| EMxylB+6GTRTT=25_F | ggtGcaattactggtgtgttacAtgaagttgcgaaagcgtATATAAAG             | Fig. 3e-g |
| EMxylB+6GTRTT=26_F | ggtGcaattactggtgtgttacAtgaagttgcgaaagcgtATATATTC             | Fig. 3e-g |
| EMxylB+6GTRTT=27_F | ggtGcgaattactggtgtgttacAtgaagttgcgaaagcgtATACATCT            | Fig. 3e-g |
| EMxylB+6GTRTT=28_F | ggtGccgaattactggtgtgttacAtgaagttgcgaaagcgtATACATCT           | Fig. 3e-g |
| EMxylB+6GTRTT=29_F | ggtGcgcgaattactggtgtgttacAtgaagttgcgaaagcgtAAATATAT          | Fig. 3e-g |
| EMxylB+6GTRTT=30_F | ggtGcagcgaattactggtgtgttacAtgaagttgcgaaagcgtATATATAG         | Fig. 3e-g |
| EMxylB+6GTRTT=31_F | ggtGccagcgaattactggtgtgttacAtgaagttgcgaaagcgtATAAATAT        | Fig. 3e-g |
| EMlacZ+6GTRTT=8_R  | CGCGGCTTGTTTccgaatctctatcgtgcgTtg                            | Fig. 3e-g |
| EMlacZ+6GTRTT=9_R  | CGCGATTATGTTTccgaatctctatcgtgcgTtgg                          | Fig. 3e-g |
| EMlacZ+6GTRTT=10_R | CGCGTATGTTTccgaatctctatcgtgcgTtggt                           | Fig. 3e-g |
| EMlacZ+6GTRTT=11_R | CGCGTTATGTTTccgaatctctatcgtgcgTtggtt                         | Fig. 3e-g |
| EMlacZ+6GTRTT=12_R | CGCGTATTGTTTccgaatctctatcgtgcgTtgggtg                        | Fig. 3e-g |
| EMlacZ+6GTRTT=13_R | CGCGCATTGTTTccgaatctctatcgtgcgTtgggtga                       | Fig. 3e-g |
| EMlacZ+6GTRTT=14_R | CGCGTCTTGTTTccgaatctctatcgtgcgTtgggtgaa                      | Fig. 3e-g |
| EMlacZ+6GTRTT=15_R | CGCGTAGTTGGTccgaatctctatcgtgcgTtgggtgaa                      | Fig. 3e-g |
| EMlacZ+6GTRTT=16_R | CGCGGTATGTTTccgaatctctatcgtgcgTtgggtgaa                      | Fig. 3e-g |
| EMlacZ+6GTRTT=17_R | CGCGATTGTTTccgaatctctatcgtgcgTtgggtgaa                       | Fig. 3e-g |
| EMlacZ+6GTRTT=18_R | CGCGATTGTTTccgaatctctatcgtgcgTtgggtgaa                       | Fig. 3e-g |
| EMlacZ+6GTRTT=19_R | CGCGTATTGTTTccgaatctctatcgtgcgTtgggtgaa                      | Fig. 3e-g |

|                    |                                                             |           |
|--------------------|-------------------------------------------------------------|-----------|
| EMlacZ+6GTRTT=20_R | CGCGCTTGCTGTccgaatctctatcgtgcgTtggtgaactgcac                | Fig. 3e-g |
| EMlacZ+6GTRTT=21_R | CGCGCATTTGTccgaatctctatcgtgcgTtggtgaactgcaca                | Fig. 3e-g |
| EMlacZ+6GTRTT=22_R | CGCGCATATGTccgaatctctatcgtgcgTtggtgaactgcacac               | Fig. 3e-g |
| EMlacZ+6GTRTT=23_R | CGCGATTGTTTccgaatctctatcgtgcgTtggtgaactgcacacc              | Fig. 3e-g |
| EMlacZ+6GTRTT=24_R | CGCGCACTTTGTccgaatctctatcgtgcgTtggtgaactgcacaccg            | Fig. 3e-g |
| EMlacZ+6GTRTT=25_R | CGCGACTTATGTccgaatctctatcgtgcgTtggtgaactgcacaccgc           | Fig. 3e-g |
| EMlacZ+6GTRTT=26_R | CGCGGCATATGTccgaatctctatcgtgcgTtggtgaactgcacaccgcc          | Fig. 3e-g |
| EMlacZ+6GTRTT=27_R | CGCGTTATTGTccgaatctctatcgtgcgTtggtgaactgcacaccgccg          | Fig. 3e-g |
| EMlacZ+6GTRTT=28_R | CGCGTATATGTccgaatctctatcgtgcgTtggtgaactgcacaccgccga         | Fig. 3e-g |
| EMlacZ+6GTRTT=29_R | CGCGGTACTGGGccgaatctctatcgtgcgTtggtgaactgcacaccgccga<br>c   | Fig. 3e-g |
| EMlacZ+6GTRTT=30_R | CGCGGTGTTGTTGccgaatctctatcgtgcgTtggtgaactgcacaccgccga<br>cg | Fig. 3e-g |
| EMlacZ+6GTRTT=31_R | CGCGGTGTTTAAccgaatctctatcgtgcgTtggtgaactgcacaccgccga<br>cgg | Fig. 3e-g |
| EMrpoB+6GTRTT=8_R  | CGCGGTAATTATagctgtctcagttatgTacc                            | Fig. 3e-g |
| EMrpoB+6GTRTT=9_R  | CGCGCATATATagctgtctcagttatgTacca                            | Fig. 3e-g |
| EMrpoB+6GTRTT=10_R | CGCGCTTAATTAgctgtctcagttatgTaccag                           | Fig. 3e-g |
| EMrpoB+6GTRTT=11_R | CGCGTAATTGTAgctgtctcagttatgTaccaga                          | Fig. 3e-g |
| EMrpoB+6GTRTT=12_R | CGCGATTATGTAgctgtctcagttatgTaccagaa                         | Fig. 3e-g |
| EMrpoB+6GTRTT=13_R | CGCGATAATTATagctgtctcagttatgTaccagaac                       | Fig. 3e-g |
| EMrpoB+6GTRTT=14_R | CGCGAAGGGATAgctgtctcagttatgTaccagaaca                       | Fig. 3e-g |
| EMrpoB+6GTRTT=15_R | CGCGCGATTTAAagctgtctcagttatgTaccagaacaa                     | Fig. 3e-g |
| EMrpoB+6GTRTT=16_R | CGCGGTGGAATAgctgtctcagttatgTaccagaacaac                     | Fig. 3e-g |
| EMrpoB+6GTRTT=17_R | CGCGCGGATTTAAagctgtctcagttatgTaccagaacaacc                  | Fig. 3e-g |
| EMrpoB+6GTRTT=18_R | CGCGGTCTATATagctgtctcagttatgTaccagaacaacc                   | Fig. 3e-g |
| EMrpoB+6GTRTT=19_R | CGCGAATTATATagctgtctcagttatgTaccagaacaaccg                  | Fig. 3e-g |
| EMrpoB+6GTRTT=20_R | CGCGATGTTAAAgctgtctcagttatgTaccagaacaaccgc                  | Fig. 3e-g |
| EMrpoB+6GTRTT=21_R | CGCGCGATCTATagctgtctcagttatgTaccagaacaaccgct                | Fig. 3e-g |
| EMrpoB+6GTRTT=22_R | CGCGTTTGTTATagctgtctcagttatgTaccagaacaaccgctg               | Fig. 3e-g |
| EMrpoB+6GTRTT=23_R | CGCGTATATTATagctgtctcagttatgTaccagaacaaccgctgt              | Fig. 3e-g |
| EMrpoB+6GTRTT=24_R | CGCGGTCTAATTAgctgtctcagttatgTaccagaacaaccgctgtc             | Fig. 3e-g |
| EMrpoB+6GTRTT=25_R | CGCGATAATTATagctgtctcagttatgTaccagaacaaccgctgtct            | Fig. 3e-g |
| EMrpoB+6GTRTT=26_R | CGCGATGTTATAgctgtctcagttatgTaccagaacaaccgctgtctg            | Fig. 3e-g |
| EMrpoB+6GTRTT=27_R | CGCGATCTATATagctgtctcagttatgTaccagaacaaccgctgtctga          | Fig. 3e-g |
| EMrpoB+6GTRTT=28_R | CGCGGTATAATTAgctgtctcagttatgTaccagaacaaccgctgtctgag         | Fig. 3e-g |
| EMrpoB+6GTRTT=29_R | CGCGTATAAATTAgctgtctcagttatgTaccagaacaaccgctgtctgaga        | Fig. 3e-g |
| EMrpoB+6GTRTT=30_R | CGCGATATTTATagctgtctcagttatgTaccagaacaaccgctgtctgagat       | Fig. 3e-g |
| EMrpoB+6GTRTT=31_R | CGCGGTATTTATagctgtctcagttatgTaccagaacaaccgctgtctgagatt      | Fig. 3e-g |
| EMxylB+6GTRTT=8_R  | CGCGTTAATTGAacgcttcgcaactcaTgta                             | Fig. 3e-g |
| EMxylB+6GTRTT=9_R  | CGCGCTATTTGAacgcttcgcaactcaTgtaa                            | Fig. 3e-g |
| EMxylB+6GTRTT=10_R | CGCGTATATATGacgcttcgcaactcaTgtaac                           | Fig. 3e-g |
| EMxylB+6GTRTT=11_R | CGCGGATCTTGAacgcttcgcaactcaTgtaaca                          | Fig. 3e-g |
| EMxylB+6GTRTT=12_R | CGCGGAGTATGAacgcttcgcaactcaTgtaacaa                         | Fig. 3e-g |
| EMxylB+6GTRTT=13_R | CGCGCTCTAATGacgcttcgcaactcaTgtaacaaa                        | Fig. 3e-g |
| EMxylB+6GTRTT=14_R | CGCGTTGGTATGacgcttcgcaactcaTgtaacaaag                       | Fig. 3e-g |
| EMxylB+6GTRTT=15_R | CGCGACTCTAGGacgcttcgcaactcaTgtaacaaagc                      | Fig. 3e-g |
| EMxylB+6GTRTT=16_R | CGCGGTTGATAAacgcttcgcaactcaTgtaacaaagca                     | Fig. 3e-g |

|                                         |                                                         |                |
|-----------------------------------------|---------------------------------------------------------|----------------|
| EMxylB+6GTRTT=17_R                      | CGCGACTCGGGAacgctttcgcaactcaTgtaacaaagcac               | Fig. 3e-g      |
| EMxylB+6GTRTT=18_R                      | CGCGTCTATTATacgctttcgcaactcaTgtaacaaagcacc              | Fig. 3e-g      |
| EMxylB+6GTRTT=19_R                      | CGCGGGATATTacgctttcgcaactcaTgtaacaaagcacca              | Fig. 3e-g      |
| EMxylB+6GTRTT=20_R                      | CGCGATTTATTacgctttcgcaactcaTgtaacaaagcaccag             | Fig. 3e-g      |
| EMxylB+6GTRTT=21_R                      | CGCGGGATGTATacgctttcgcaactcaTgtaacaaagcaccagt           | Fig. 3e-g      |
| EMxylB+6GTRTT=22_R                      | CGCGGGATATTacgctttcgcaactcaTgtaacaaagcaccagta           | Fig. 3e-g      |
| EMxylB+6GTRTT=23_R                      | CGCGGTGTGTAAacgctttcgcaactcaTgtaacaaagcaccagtaa         | Fig. 3e-g      |
| EMxylB+6GTRTT=24_R                      | CGCGCAATATTacgctttcgcaactcaTgtaacaaagcaccagtaat         | Fig. 3e-g      |
| EMxylB+6GTRTT=25_R                      | CGCGCTTTATATacgctttcgcaactcaTgtaacaaagcaccagtaatt       | Fig. 3e-g      |
| EMxylB+6GTRTT=26_R                      | CGCGGAATATATacgctttcgcaactcaTgtaacaaagcaccagtaattt      | Fig. 3e-g      |
| EMxylB+6GTRTT=27_R                      | CGCGAGATGTATacgctttcgcaactcaTgtaacaaagcaccagtaatttc     | Fig. 3e-g      |
| EMxylB+6GTRTT=28_R                      | CGCGAGATGTATacgctttcgcaactcaTgtaacaaagcaccagtaatttcg    | Fig. 3e-g      |
| EMxylB+6GTRTT=29_R                      | CGCGATATATTacgctttcgcaactcaTgtaacaaagcaccagtaatttcgc    | Fig. 3e-g      |
| EMxylB+6GTRTT=30_R                      | CGCGCTATATATacgctttcgcaactcaTgtaacaaagcaccagtaatttcgct  | Fig. 3e-g      |
| EMxylB+6GTRTT=31_R                      | CGCGATATTTATacgctttcgcaactcaTgtaacaaagcaccagtaatttcgctg | Fig. 3e-g      |
| pegRNA2_tevopreQ1galK<br>+5G-to-T_F     | ggtGcgcagtttcAatgcCCAAAGGTGTGGCAAATATTC                 | Fig. 3hFig. 4a |
| pegRNA2_tevopreQ1galK<br>+5TTAA ins_F   | ggtGcgcagtttcTTAAatgcCCAAAGGTGTGGCACAATATT              | Fig. 3hFig. 4a |
| pegRNA2_tevopreQ1galK<br>+4-6 TGG del_F | ggtGcaaagcagtttgcCCAAAGGTGTGGCACAGGAAT                  | Fig. 3hFig. 4a |
| pegRNA2_tevopreQ1pta+5<br>G-to-T_F      | ggtGcaagtgtcAagcaTGTGCGGAATGCTATCAAATT                  | Fig. 3hFig. 4a |
| pegRNA2_tevopreQ1pta+5<br>TTAA ins_F    | ggtGcaagtgtccTTAAagcaTGTGCGGAATGCTAATAGATC              | Fig. 3hFig. 4a |
| pegRNA2_tevopreQ1pta+4<br>-6 TGG del_F  | ggtGccggaagtgtgcaTGTGCGGAATGCTATAAACAA                  | Fig. 3hFig. 4a |
| pegRNA2_tevopreQ1xylB<br>+5G-to-T_F     | ggtGctttgttacAtgaaGTTGCGAAAGCGTTCAATCAG                 | Fig. 3hFig. 4a |
| pegRNA2_tevopreQ1xylB<br>+5TTAA ins_F   | ggtGctttgttaccTTAAatgaaGTTGCGAAAGCGTCATATATA            | Fig. 3hFig. 4a |
| pegRNA2_tevopreQ1xylB<br>+4-6 AGG del_F | ggtGctgctttgtagaaGTTGCGAAAGCGTCACACCGA                  | Fig. 3hFig. 4a |
| pegRNA2_tevopreQ1adhE<br>+5G-to-T_F     | ggtGccggagcacAggcaGCGATAGCAGCCTAATATTGA                 | Fig. 3hFig. 4a |
| pegRNA2_tevopreQ1adhE<br>+5TTAA ins_F   | ggtGccggagcaccTTAAaggcaGCGATAGCAGCCTAACTATAA            | Fig. 3hFig. 4a |
| pegRNA2_tevopreQ1adhE<br>+4-6 CGG del_F | ggtGctttcgagcagcaGCGATAGCAGCCTAATACCAA                  | Fig. 3hFig. 4a |
| pegRNA2_tevopreQ1galK<br>+5G-to-T_R     | CGCGGAATATTTgccacaccttgggcatTgaaactgc                   | Fig. 3hFig. 4a |
| pegRNA2_tevopreQ1galK<br>+5TTAA ins_R   | CGCGAATATTGTgccacaccttgggcatTTAAaggaaactgc              | Fig. 3hFig. 4a |
| pegRNA2_tevopreQ1galK<br>+4-6 TGG del_R | CGCGATTCTGTgccacaccttgggcaaaactgc                       | Fig. 3hFig. 4a |
| pegRNA2_tevopreQ1pta+5<br>G-to-T_R      | CGCGAATTTGATagcattccgcatgctTgagcactt                    | Fig. 3hFig. 4a |
| pegRNA2_tevopreQ1pta+5<br>TTAA ins_R    | CGCGGATCTATagcattccgcatgctTTAAaggagcactt                | Fig. 3hFig. 4a |

|                                                |                                                 |                |
|------------------------------------------------|-------------------------------------------------|----------------|
| pegRNA2_tevopreQ1pta+4<br>-6 TGG del_R         | CGCGTTGTTTATagcattccgcacatgcagcactt             | Fig. 3hFig. 4a |
| pegRNA2_tevopreQ1xylB<br>+5G-to-T_R            | CGCGCTGATTGAacgctttcgaacttcaTgtaacaaa           | Fig. 3hFig. 4a |
| pegRNA2_tevopreQ1xylB<br>+5TTAA ins_R          | CGCGTATATATGacgctttcgaacttcaTTAAggttaacaaa      | Fig. 3hFig. 4a |
| pegRNA2_tevopreQ1xylB<br>+4-6 AGG del_R        | CGCGTCGGTGTGacgctttcgaacttcaacaaa               | Fig. 3hFig. 4a |
| pegRNA2_tevopreQ1adhE<br>+5G-to-T_R            | CGCGTCAATATTaggctgctatcgctgccTgtgctccg          | Fig. 3hFig. 4a |
| pegRNA2_tevopreQ1adhE<br>+5TTAA ins_R          | CGCGTTATAGTTaggctgctatcgctgccTTAAggtgctccg      | Fig. 3hFig. 4a |
| pegRNA2_tevopreQ1adhE<br>+4-6 CGG del_R        | CGCGTTGGTATTaggctgctatcgctgctgctccg             | Fig. 3hFig. 4a |
| pegRNA2_tevopreQ1lacZ+<br>5G-to-T_F            | ggtGctcaaccacAgcacGATAGAGATTTCGGAAACAAAT        | Fig. 3h        |
| pegRNA2_tevopreQ1lacZ+<br>5TTAA ins_F          | ggtGctcaaccaccTTAAgcacGATAGAGATTTCGGACCCACAT    | Fig. 3h        |
| pegRNA2_tevopreQ1lacZ+<br>4-6 CGG del_F        | ggtGcagttcaaccacacGATAGAGATTTCGGAAACATAA        | Fig. 3h        |
| pegRNA2_tevopreQ1lacZ+<br>5G-to-T_R            | CGCGATTGTTTccgaatctctatcgctgcTgtggttga          | Fig. 3h        |
| pegRNA2_tevopreQ1lacZ+<br>5TTAA ins_R          | CGCGATGTGGGTccgaatctctatcgctgcTTAAggtggttga     | Fig. 3h        |
| pegRNA2_tevopreQ1lacZ+<br>4-6 CGG del_R        | CGCGTTATGTTTccgaatctctatcgctggttga              | Fig. 3h        |
| pyrF_T1_F                                      | TAGTTGATAATCGCGATAAAGCGCGTTTT                   | Fig. 4b        |
| pyrF_T2_F                                      | TAGTCATGGAGTCCAGCGACCTGCGTTTT                   | Fig. 4b        |
| fosA_F                                         | TAGTCTGCTTCGCCGCTCGTCTTGGTTTT                   | Fig. 4b        |
| ramA_T1_F                                      | TAGTGATATCGTAGACCCGCTGATGTTTT                   | Fig. 4b        |
| pyrF_T1_R                                      | gctctaaaacGCGCTTTATCGCGATTATCA                  | Fig. 4b        |
| pyrF_T2_R                                      | gctctaaaacGCAGGTCGCTGGACTCCATG                  | Fig. 4b        |
| fosA_R                                         | gctctaaaacCAAGACGAGCGGCGAAGCAG                  | Fig. 4b        |
| ramA_T1_R                                      | gctctaaaacATCAGCGGGTCTACGATATC                  | Fig. 4b        |
| pegRNA2_tevopreQ1pyrF_<br>T1pyrF+6G-to-T_F     | ggtGcACAAATGACAGCGCTTTATCGCGATTTGAAACCG         | Fig. 4b        |
| pegRNA2_tevopreQ1pyrF_<br>T1pyrF+5TTAA ins_F   | ggtGcACAAATGCCttaaAGCGCTTTATCGCGATTTGACCTA<br>T | Fig. 4b        |
| pegRNA2_tevopreQ1pyrF_<br>T1pyrF+4-6 TGG del_F | ggtGcTCGACAAATGGCGCTTTATCGCGATTTGAACTAG         | Fig. 4b        |
| pegRNA2_tevopreQ1pyrF_<br>T2pyrF+6G-to-T_F     | ggtGcCCCAGATACTGCAGGTCGCTGGACTCAAACCTAAA        | Fig. 4b        |
| pegRNA2_tevopreQ1pyrF_<br>T2pyrF+5TTAA ins_F   | ggtGcCCCAGATCCTTAATGCAGGTCGCTGGACTCAACT<br>CCCC | Fig. 4b        |
| pegRNA2_tevopreQ1pyrF_<br>T2pyrF+4-6 AGG del_F | ggtGcATGCCAGATGCAGGTCGCTGGACTCAACTTATT          | Fig. 4b        |
| pegRNA2_tevopreQ1fosAf<br>osA+6G-to-T_F        | ggtGcCCGCAAACTCAAGACGAGCGGCGAATTTAAAC<br>A      | Fig. 4b        |
| pegRNA2_tevopreQ1fosAf                         | ggtGcCCGCAACCTTAATCAAGACGAGCGGCGAATTTA          | Fig. 4b        |



|                                                |                                                 |         |
|------------------------------------------------|-------------------------------------------------|---------|
| osA+5TTAA ins_F                                | ACCT                                            |         |
| pegRNA2_tevopreQ1fosAf<br>osA+4-6 AGG del_F    | ggtGcACGCCGGCAACAAGACGAGCGGCGAAATTAAC<br>A      | Fig. 4b |
| pegRNA2_tevopreQ1ramA<br>_T1ramA+5G-to-T_F     | ggtGcCGCGACACAGATCAGCGGGTCTACGAAACAAATG         | Fig. 4b |
| pegRNA2_tevopreQ1ramA<br>_T1ramA+5TTAA ins_F   | ggtGcCGCGACACCTTAAGATCAGCGGGTCTACGAGGAA<br>AGGC | Fig. 4b |
| pegRNA2_tevopreQ1ramA<br>_T1ramA+4-6 CGG del_F | ggtGcCTGCGCGACAATCAGCGGGTCTACGACGCAGAAT         | Fig. 4b |
| pegRNA2_tevopreQ1pyrF_<br>T1pyrF+6G-to-T_R     | CGCGCGGGTTTCAAATCGCGATAAAGCGCTGcATTGT           | Fig. 4b |
| pegRNA2_tevopreQ1pyrF_<br>T1pyrF+5TTAA ins_R   | CGCGATAGGTCAAATCGCGATAAAGCGCTtaaGGCATT<br>GT    | Fig. 4b |
| pegRNA2_tevopreQ1pyrF_<br>T1pyrF+4-6 TGG del_R | CGCGCTAGTTCAAATCGCGATAAAGCGCCATTGTGCGA          | Fig. 4b |
| pegRNA2_tevopreQ1pyrF_<br>T2pyrF+6G-to-T_R     | CGCGTTTTAGTTTGTAGTCCAGCGACCTGCAGtATCTGGG        | Fig. 4b |
| pegRNA2_tevopreQ1pyrF_<br>T2pyrF+5TTAA ins_R   | CGCGCGGGAGTTGAGTCCAGCGACCTGCATTAAGGATC<br>TGGG  | Fig. 4b |
| pegRNA2_tevopreQ1pyrF_<br>T2pyrF+4-6 AGG del_R | CGCGAATAAGTTGAGTCCAGCGACCTGCATCTGGGCAT          | Fig. 4b |
| pegRNA2_tevopreQ1fosAf<br>osA+6G-to-T_R        | CGCGTGTTTTAAATTCGCCGCTCGTCTTGAGtTGCCGG          | Fig. 4b |
| pegRNA2_tevopreQ1fosAf<br>osA+5TTAA ins_R      | CGCGAGGTTAAATTCGCCGCTCGTCTTGATTAAGGTTG<br>CCGG  | Fig. 4b |
| pegRNA2_tevopreQ1fosAf<br>osA+4-6 AGG del_R    | CGCGTGTTTTAATTCGCCGCTCGTCTTGTTGCCGGCGT          | Fig. 4b |
| pegRNA2_tevopreQ1ramA<br>_T1ramA+5G-to-T_R     | CGCGCATTGTGTTTCGTAGACCCGCTGATcGTGTGCGG          | Fig. 4b |
| pegRNA2_tevopreQ1ramA<br>_T1ramA+5TTAA ins_R   | CGCGGCCTTTCCTCGTAGACCCGCTGATCTTAAGGTGT<br>CGCG  | Fig. 4b |
| pegRNA2_tevopreQ1ramA<br>_T1ramA+4-6 CGG del_R | CGCGATTCTGCGTCGTAGACCCGCTGATTGTGCGGCAG          | Fig. 4b |
| GGA_KO_KP_sbcB_4_F                             | tagtGTGCCGCAAACCTGCATCGT                        | Fig. 4b |
| GGA_KO_KP_xseA_2_F                             | tagtAACTTCATCCAGCCTTCTTC                        | Fig. 4b |
| GGA_KO_KP_exoX_2_F                             | tagtCACCAATCCATGAGTCATC                         | Fig. 4b |
| GGA_KO_KP_sbcB_4_R                             | aaacACGATGCAGGTTTGCGGCAC                        | Fig. 4b |
| GGA_KO_KP_xseA_2_R                             | aaacGAAGAAGGCTGGATGAAGTT                        | Fig. 4b |
| GGA_KO_KP_exoX_2_R                             | aaacGATGACTCATGGGATTGGTG                        | Fig. 4b |
| aceI_T1_F                                      | TAGTgagcggtaattgaaccaaGTTTT                     | Fig. 4c |
| aceI_T2_F                                      | TAGTcttggatgcaaatgctcaGTTTT                     | Fig. 4c |
| adeB_T1_F                                      | TAGTactattccgttctctctcaGTTTT                    | Fig. 4c |
| cpdA_T1_F                                      | TAGTcatcaacaacctgattgtGTTTT                     | Fig. 4c |
| cpdA_T2_F                                      | TAGTgattccctaataatctggcaGTTTT                   | Fig. 4c |
| cpdA_T3_F                                      | TAGTtacattcgtctgaataacgaGTTTT                   | Fig. 4c |
| entE_T1_F                                      | TAGTtgcaggatgtgttgaGTTTT                        | Fig. 4c |
| aceI_T1_R                                      | gctctaaaactgggtcaattgaccgctc                    | Fig. 4c |
| aceI_T2_R                                      | gctctaaaactgaagcatttgcattccaag                  | Fig. 4c |
| adeB_T1_R                                      | gctctaaaactgacagacaacggaatgt                    | Fig. 4c |

|                                           |                                         |         |
|-------------------------------------------|-----------------------------------------|---------|
| cpdA_T1_R                                 | gctctaaaacacaactacaggtgttgatg           | Fig. 4c |
| cpdA_T2_R                                 | gctctaaaactgccagatattaagggatc           | Fig. 4c |
| cpdA_T3_R                                 | gctctaaaactcgtattcagacgaatga            | Fig. 4c |
| entE_T1_R                                 | gctctaaaactcacaacacatccacctgea          | Fig. 4c |
| pegRNA2_tevopreQ1aceI_T1aceI_T1+5G_to_T_F | ggtGcagatgcacAattgggttcaattgaccAAAGATAG | Fig. 4c |
| pegRNA2_tevopreQ1aceI_T2aceI_T2+5G_to_T_F | ggtGcacgaaatcAatgaagcattgcatccATCTACGT  | Fig. 4c |
| pegRNA2_tevopreQ1adeB_T1adeB_T1+5G_to_T_F | ggtGccaattgccAttgagcagacaacggaaCCTTAAAC | Fig. 4c |
| pegRNA2_tevopreQ1cpdA_T1cpdA_T1+5G_to_T_F | ggtGctcctaaacAgacaactacaggtgttACAATTCT  | Fig. 4c |
| pegRNA2_tevopreQ1cpdA_T2cpdA_T2+5G_to_T_F | ggtGcctegatacAttgccagatattaagggCCCAAAGG | Fig. 4c |
| pegRNA2_tevopreQ1cpdA_T3cpdA_T3+5G_to_T_F | ggtGcaaaactacAatcgttattcagacgaaCCTTATTA | Fig. 4c |
| pegRNA2_tevopreQ1entE_T1entE_T1+5G_to_T_F | ggtGctttggtgcAatcacacaacatccaccCCTTCTAG | Fig. 4c |
| pegRNA2_tevopreQ1aceI_T1aceI_T1+5G_to_T_R | CGCGCTATCTTTggtcaattgaaccaatTgtgcatct   | Fig. 4c |
| pegRNA2_tevopreQ1aceI_T2aceI_T2+5G_to_T_R | CGCGACGTAGATggatgcaaatgcttcatTgattcgt   | Fig. 4c |
| pegRNA2_tevopreQ1adeB_T1adeB_T1+5G_to_T_R | CGCGGTTTAAGGttccgtgtctgctcaaTggcaattg   | Fig. 4c |
| pegRNA2_tevopreQ1cpdA_T1cpdA_T1+5G_to_T_R | CGCGAGAATTGTaacaacctgtagttgcTgtagga     | Fig. 4c |
| pegRNA2_tevopreQ1cpdA_T2cpdA_T2+5G_to_T_R | CGCGCCTTTGGGcccttaatatctggcaaTgtatcgag  | Fig. 4c |
| pegRNA2_tevopreQ1cpdA_T3cpdA_T3+5G_to_T_R | CGCGTAATAAGGttcgtctgaataacgatTgtagttt   | Fig. 4c |
| pegRNA2_tevopreQ1entE_T1entE_T1+5G_to_T_R | CGCGCTAGAAGgggtggatgtgtgtgatTgcacaaa    | Fig. 4c |
| GGA_KO_Ab_xseA_3_F                        | tagtctcaaaatgctgcgggttt                 | Fig. 4c |
| GGA_KO_Ab_exoX_1_F                        | tagtttgatcaacttatacaagt                 | Fig. 4c |
| GGA_KO_Ab_xseA_3_R                        | aaacaaccgcagcattttgagg                  | Fig. 4c |
| GGA_KO_Ab_exoX_1_R                        | aaacactgataaagttgatcaaa                 | Fig. 4c |
| CRISPRi_GGA_sbcB_T1_F                     | GTAGATacctaataatgatgatgacggtaagTTTTTTT  | Sup.10  |
| CRISPRi_GGA_sbcB_T2_F                     | GTAGATacgattacgaaacctttggcacgTTTTTTT    | Sup.10  |
| CRISPRi_GGA_xseA_T1_F                     | GTAGATatctcgtcacatgttaccttctTTTTTTT     | Sup.10  |
| CRISPRi_GGA_xseA_T2_F                     | GTAGATacgcaaccagcttccggctcactgTTTTTTT   | Sup.10  |
| CRISPRi_GGA_exoX_T1_F                     | GTAGATcaggaggatcgttgatgattgcTTTTTTT     | Sup.10  |
| CRISPRi_GGA_exoX_T2_F                     | GTAGATtggcctggatcaagtacagcaaTTTTTTT     | Sup.10  |
| CRISPRi_GGA_sbcB_T1_F                     | cttcaaaaaactaccgtcattcattaggatAT        | Sup.10  |

|                           |                                                             |                  |
|---------------------------|-------------------------------------------------------------|------------------|
| R                         |                                                             |                  |
| CRISPRi_GGA_sbcB_T2_R     | cttcaaaaaaacgtgccaaaagtttcgtaaatcgtAT                       | Sup.10           |
| CRISPRi_GGA_xseA_T1_R     | cttcaaaaaaagaaggtaacatgtgagcgagatAT                         | Sup.10           |
| CRISPRi_GGA_xseA_T2_R     | cttcaaaaaaacagtgaccggaagctggttgcgtAT                        | Sup.10           |
| CRISPRi_GGA_exoX_T1_R     | cttcaaaaaagcaatctcaacgatccctccctgAT                         | Sup.10           |
| CRISPRi_GGA_exoX_T2_R     | cttcaaaaaaattgctgtactgatcccagccaAT                          | Sup.10           |
| pBbS8c-ddcpfl@GGAmethod_R | AGATGCGggtctcGctacaagagtagaaattgaaattgtatccgctcac           | Sup.10           |
| pBbS8c-ddcpfl@GGAmethod_F | CGCATCTggtctCagaagctgggcccgaacaaaaactc                      | Sup.10           |
| MS_PE_1                   | aagctggacttcAGCGGCGGTTCTTCCGGCGG                            | MS_PE            |
| MS_PE_2                   | AGAACCGCCGCTgaagtcagcttcgcttgt                              | MS_PE            |
| MS_PE_3                   | ctcactcaaaggTGGCTCACGCAAAAACACGAACCACAC                     | MS_PE            |
| MS_PE_4                   | TTGCGTGAGCCAaccttgagtgagctgatacc                            | MS_PE            |
| MS_PE_5                   | atcctcatcggtgctctctcccagattatctactgataggatcgcaaatc          | MS_PE            |
| MS_PE_6                   | gaagagccaccgatgaggatctcgtacccgctcttctgTtttttaatacggttatccac | MS_PE            |
| MS_PE_7                   | ggcctggAcatacggcatcggctc                                    | MS_PE            |
| MS_PE_8                   | tgccgatgTccaggcccagcacc                                     | MS_PE            |
| MS_PE_Cb_1                | acgttggtctctcgtcgaacgctgtttgctcc                            | MS_PE_Cb         |
| MS_PE_Cb_2                | agcgttgcgacgagacacaacgtgctttccc                             | MS_PE_Cb         |
| MS_PE_Cb_3                | gttggtgagagcggaaatgtcgcggaacccc                             | MS_PE_Cb         |
| MS_PE_Cb_4                | cgcgcacattccgctctccaaccctggctc                              | MS_PE_Cb         |
| PEE1_1                    | taaggaggtataaaaaatgataaagaataactcaataggcttagatac            | SpPE             |
| PEE1_2                    | cctattgagtattcttatccattttataacctccttagagctcgaatc            | SpPE             |
| PEE1_3                    | ccatgggtatggTTCCATAGGCTCCGCCCCC                             | SpPE             |
| PEE1_4                    | AGCCTATGAAAaccataccatggattctctctg                           | SpPE             |
| PEE1_5                    | AAACGATCTCAAgtcgaacgctgtttgctc                              | SpPE             |
| PEE1_6                    | agcgtttgcgacTTGAGATCGTTTTGGTCTGCGCG                         | SpPE             |
| PEE1_7                    | aagttgtcataaataatcgtatgcaggtggcac                           | SpPE             |
| PEE1_8                    | tgcatcgattattatgacaactgacggcta                              | SpPE             |
| epegRNA_accepter_1        | aagcttgatataACGCTGTGGAAGTTGACAGC                            | epegRNA_accepter |
| epegRNA_accepter_2        | CTTCCACAGCGTgatatacaagcttgaactttatg                         | epegRNA_accepter |
| epegRNA_accepter_3        | atcattaatgcACCTCGATACCCAAAAAACC                             | epegRNA_accepter |
| epegRNA_accepter_4        | GGGTATCGAGGTgcattaatgaatcgccaac                             | epegRNA_accepter |
| epegRNA_accepter_5        | GCGATCGTCTCGGACTGAGCTAGCTGTCAAaaaggcctcgtgatacggc           | epegRNA_accepter |
| epegRNA_accepter_6        | GCTCAGTCCGAGACGATCGCTACGTCTCAcacagctgtctgtaagcgg            | epegRNA_accepter |
| Ab_PE_1                   | ttcttatccatgaattctgttctctgtgaaattgttac                      | Ab_PE            |
| Ab_PE_2                   | gaaacagaattcatggataaagaataactcaataggcttag                   | Ab_PE            |
| Ab_PE_3                   | tacgccaaccagccataccatggattctctctg                           | Ab_PE            |
| Ab_PE_4                   | ccatgggtatggctggtggcgtactgtgtg                              | Ab_PE            |
| KP_PE_1                   | gccgatcaacgtcacattccccgaaaagtgc                             | KP_PE            |
| KP_PE_2                   | aggtagtcggcactgtcagaccaagtttactc                            | KP_PE            |

|                       |                                    |                     |
|-----------------------|------------------------------------|---------------------|
| KP_PE_3               | ttggtctgacagtgccgactaccttggtgatctc | KP_PE               |
| KP_PE_4               | cggggaatgtgacgttgatcggcacgtaagag   | KP_PE               |
| pBbS8c_ddCpfl_final_1 | tcacatggactaccggatctgcgattctgata   | pBbS8c_ddCpfl_final |
| pBbS8c_ddCpfl_final_2 | tcgcagatccggtagtccatgtgacctcaccc   | pBbS8c_ddCpfl_final |
| pBbS8c_ddCpfl_final_3 | ctggtgttctcgcaggtgtctatgtgtgactg   | pBbS8c_ddCpfl_final |
| pBbS8c_ddCpfl_final_4 | atagacagcctgcgagaacaccagaacagccc   | pBbS8c_ddCpfl_final |

### Digest pegRNA2\_tevopreQ1 with BsaI

|                             |                             |
|-----------------------------|-----------------------------|
| 4000 ng pegRNA2_tevopreQ1   | x $\mu$ L                   |
| Bsal-HF-v2                  | 2 $\mu$ L                   |
| 10 $\times$ Cutsmart buffer | 5 $\mu$ L                   |
| H <sub>2</sub> O            | up to 50 $\mu$ L            |
| <b>Total volume</b>         | <b>50 <math>\mu</math>L</b> |

Incubate at 37°C for 12 h,  
isolate using TIANquick Midi Purification Kit.

### Anneal and phosphorylation of primers

pegRNA spacer (annealed and 5' phosphorylated)

5' TAGTNNNNNNNNNNNNNNNNNNNNNGTTT 3'  
3' NNNNNNNNNNNNNNNNNNNNCAAAATCTC 5'

pegRNA 3' extension (annealed and 5' phosphorylated)

5' GGTGCHNNNNNNNNNNNNNNNNNNNNNNNN 3'  
3' NNNNNNNNNNNNNNNNNNNNNNNNGGCC 5'

pegRNA scaffold (annealed and 5' phosphorylated)

5' AGAGCTAGAAAATAGCAAGTTAAATAAGGCTAGTCCGTTATCAACTTGAAAAGTGGCACCAGTC 3'  
3' ATCTTTATCGTTCAAATTTTATTCGGATCAGGCAATAGTTGAACTTTTCCCGTGGCTCAGCCACG 5'

|                                |                             |
|--------------------------------|-----------------------------|
| oligonucleotide F (10 $\mu$ M) | 10 $\mu$ L                  |
| oligonucleotide R (10 $\mu$ M) | 10 $\mu$ L                  |
| 5 $\times$ Anneal buffer       | 5 $\mu$ L                   |
| <b>Total volume</b>            | <b>25 <math>\mu</math>L</b> |

Incubate at 85°C for 3 min,  
cool gradually (-0.1°C/s) to 22°C.

|                                  |                             |
|----------------------------------|-----------------------------|
| annealed oligonucleotide         | 2.5 $\mu$ L                 |
| 10 $\times$ T4 DNA ligase buffer | 1 $\mu$ L                   |
| T4 PNK                           | 0.5 $\mu$ L                 |
| H <sub>2</sub> O                 | up to 10 $\mu$ L            |
| <b>Total volume</b>              | <b>10 <math>\mu</math>L</b> |

Incubate at 37°C for 30 min.

### pegRNA assembly

|                                                      |                             |
|------------------------------------------------------|-----------------------------|
| pegRNA spacer (annealed and 5' phosphorylated)       | 1 $\mu$ L                   |
| pegRNA 3' extension (annealed and 5' phosphorylated) | 1 $\mu$ L                   |
| pegRNA scaffold (annealed and 5' phosphorylated)     | 1 $\mu$ L                   |
| digested pegRNA2_tevopreQ1                           | 20 ng                       |
| 10 $\times$ T4 DNA ligase buffer                     | 1 $\mu$ L                   |
| T4 DNA ligase                                        | 0.5 $\mu$ L                 |
| Bsal-HF-v2                                           | 0.5 $\mu$ L                 |
| H <sub>2</sub> O                                     | up to 10 $\mu$ L            |
| <b>Total volume</b>                                  | <b>10 <math>\mu</math>L</b> |

Run the following program in a thermocycler: 37°C for 3 min  
16°C for 3 min } 16 cycles  
37°C for 30 min  
70°C for 5 min  
10°C forever

## Supplementary Note 1. Overview of pegRNA cloning protocol.

## References

1. Baba T, *et al.* Construction of Escherichia coli K-12 in-frame, single-gene knockout mutants: the Keio collection. *Molecular Systems Biology* **2**, 2006.0008 (2006).
2. Jiang W, Bikard D, Cox D, Zhang F, Marraffini LA. RNA-guided editing of bacterial genomes using CRISPR-Cas systems. *Nature Biotechnology* **31**, 233-239 (2013).
3. Jervis AJ, Hanks EKR, Dunstan MS, Robinson CJ, Takano E, Scrutton NS. A plasmid toolset for CRISPR-mediated genome editing and CRISPRi gene regulation in Escherichia coli. *Microbial Biotechnology* **14**, 1120-1129 (2021).
4. Wang Y, Wang Z, Chen Y, Hua X, Yu Y, Ji Q. A Highly Efficient CRISPR-Cas9-Based Genome Engineering Platform in Acinetobacter baumannii to Understand the H<sub>2</sub>O<sub>2</sub>-Sensing Mechanism of OxyR. *Cell Chemical Biology* **26**, 1732-1742.e1735 (2019).
5. Wang Y, *et al.* CRISPR-Cas9 and CRISPR-Assisted Cytidine Deaminase Enable Precise and Efficient Genome Editing in Klebsiella pneumoniae. *Applied and Environmental Microbiology* **84**, e01834-01818 (2018).
